1 **Title**

2 Logical design of oral glucose ingestion pattern minimizing blood glucose in humans

3 **Author**

4 Masashi Fujii<sup>1,2,\*</sup>, Yohei Murakami<sup>3,\*</sup>, Yasuaki Karasawa<sup>4,5,\*</sup>, Yohei Sumitomo<sup>2</sup>, Suguru Fujita<sup>2</sup>,

5 Masanori Koyama<sup>6</sup>, Shinsuke Uda<sup>7</sup>, Hiroyuki Kubota<sup>7</sup>, Hiroshi Inoue<sup>8</sup>, Katsumi Konishi<sup>9</sup>,

6 Shigeyuki Oba<sup>3</sup>, Shin Ishii<sup>3,10</sup>, Shinya Kuroda<sup>1,2,10</sup>

7 **Lead Contact**

8 Shinya Kuroda: skuroda@bs.s.u-tokyo.ac.jp

9 **Affiliation**

10 <sup>1</sup>Molecular Genetic Research Laboratory, Graduate School of Science, The University of Tokyo,

11 Tokyo, 113-0033, Japan

12 <sup>2</sup>Department of Biological Sciences, Graduate School of Science, The University of Tokyo,

13 Tokyo, 113-0033, Japan

14 <sup>3</sup>Department of Systems Science, Graduate School of Informatics, Kyoto University, Kyoto,

15 606-8501, Japan

16 <sup>4</sup>Department of Neurosurgery, The University of Tokyo Hospital

17 <sup>5</sup>Department of Rehabilitation, Graduate School of Medicine, The University of Tokyo,

18 113-0033, Japan

19 <sup>6</sup>Department of Mathematics, Graduate School of Science and Engineering, Ritsumeikan

20 University, Shiga, 525-8577, Japan

21 <sup>7</sup>Division of Integrated Omics, Research Center for Transomics Medicine, Medical Institute of

22 Bioregulation, Kyushu University, Fukuoka, 812-8582, Japan

23 <sup>8</sup>Metabolism and Nutrition Research Unit, Institute for Frontier Science Initiative, Kanazawa

24 University, Ishikawa, 920-8640, Japan

25 <sup>9</sup>Department of Computer Science, Faculty of Informatics, Kogakuin University, Tokyo,

26 163-8677, Japan

27 <sup>10</sup>CREST, Japan Science and Technology Agency, Tokyo, 113-0033, Japan

28 \*These authors contributed equally to this work.

29

## 30 **SUMMARY**

31 Excessive increase in blood glucose level after eating increases the risk of macroangiopathy,

32 and a method for not increasing the postprandial blood glucose level is desired. However, a

33 logical design method of the dietary ingestion pattern controlling the postprandial blood glucose

34 level has not yet been established. We constructed a mathematical model of blood glucose  
35 control by oral glucose ingestion in 3 healthy human subjects, used the model to predict an  
36 optimal glucose ingestion pattern, and showed that the optimal ingestion pattern minimized the  
37 peak value of blood glucose level. Subjects orally ingested 3 doses of glucose by bolus or over 2  
38 hours, and blood glucose, insulin, C-peptide and incretins were measured for 4 hours. We  
39 constructed an ordinary differential equation model that reproduced the time course data of the  
40 blood glucose and blood hormone levels. Using the model, we predicted that intermittent  
41 ingestion 30 minutes apart was the optimal glucose ingestion patterns that minimized the peak  
42 value of blood glucose level. We confirmed with subjects that this intermittent pattern decreased  
43 the peak value of blood glucose level. This approach could be applied to design optimal dietary  
44 ingestion patterns.

#### 45 **In Brief**

46 As a forward problem, we measured blood glucose and hormones in three human subjects after  
47 oral glucose ingestion and constructed a mathematical model of blood glucose control. As an  
48 inverse problem, we used the model to predict the optimal oral glucose ingestion pattern that  
49 minimized the peak value of blood glucose level, and validated the pattern with the subjects.

50 **Highlights**

- 51 ● Modeling blood glucose concentrations predicts an intermittent ingestion pattern is optimal
- 52 ● Human validation shows ingestion at 30-minute intervals limits peak blood glucose
- 53 ● We provide a strategy to design optimal dietary ingestion patterns

54

55 **INTRODUCTION**

56 In healthy people, blood glucose levels are stably maintained and show only a slight  
57 postprandial increase (Abdul-Ghani et al., 2006). However, massive postprandial increases in  
58 blood glucose levels emerge in patients with the type 2 diabetic mellitus (T2DM) and impaired  
59 glucose tolerance (Edelstein et al., 1997). This postprandial hyperglycemia requires prevention  
60 and treatment, because it is associated with increased risk of cardiac and cerebrovascular  
61 complications (Nakagami and DECODA Study Group, 2004). Postprandial blood glucose  
62 originates from dietary carbohydrates (Cahill, 2006). Some approaches to prevent postprandial  
63 hyperglycemia have thus far been reduction of dietary carbohydrate content, a change in the  
64 type of dietary carbohydrates, and ingestion of dietary fiber with meals (Schulze et al., 2004).  
65 However, the ideal type of pattern of ingestion of carbohydrate that minimize postprandial  
66 hyperglycemia is unknown.

67 Insulin, secreted from the pancreatic  $\beta$  cells, performs a pivotal role in homeostatic regulation  
68 of blood glucose levels. Insulin acts on the target organs such as muscle and liver, to promote  
69 uptake of glucose from the blood and suppress hepatic glucose production. Consequently,  
70 insulin decreases blood glucose levels and promotes the rapid recovery of increase in

71 postprandial blood glucose. As blood glucose levels decrease, insulin secretion also decreases.

72 Thus, the blood glucose level is maintained within a narrow normal range by the feedback

73 relationship between blood glucose and insulin (Castillo et al., 1994).

74 Although insulin secretion is regulated mainly by blood glucose, it is also regulated by a

75 family of circulating hormones called incretins (Seino et al., 2010). Incretins are hormones

76 secreted from the gastrointestinal tract upon food ingestion, these hormones act on pancreatic  $\beta$

77 cells to promote insulin secretion. Gastric inhibitory polypeptide (GIP) and glucagon-like

78 peptide-1 (GLP-1) are incretins (Fujimoto et al., 2009; Preitner et al., 2004; Seino et al., 2010;

79 Vollmer et al., 2008). GIP is secreted from K cells of the upper small intestine (Inagaki et al.,

80 1989; Takeda et al., 1987); GLP-1 is secreted from L cells of the lower small intestine (Bell et

81 al., 1983; Orskov et al., 1993). Orally ingested glucose promotes incretin secretion into the

82 small intestine, where it is absorbed and enters the blood. Blood glucose and incretin act

83 cooperatively on pancreatic  $\beta$  cells to promote insulin secretion and increase circulating insulin

84 levels (Parkes et al., 2001).

85 Postprandial hyperglycemia is identified with an oral glucose tolerance test (OGTT), in which

86 a subject's ability to tolerate a glucose load (glucose tolerance) is evaluated by measuring blood

87 glucose level after an overnight fast and again 2 h after a 75-g oral glucose load (Stumvoll et al.,  
88 2000). Using time course data of glucose and insulin in the blood during the OGTT, many  
89 mathematical models have quantitatively evaluated the relationship between the blood glucose  
90 and insulin in humans (Bergman et al., 1979; Brubaker et al., 2007; Dalla Man et al., 2016,  
91 2013, 2007, 2006; De Gaetano et al., 2013; Hill et al., 1997; Kabul et al., 2015; Kim et al.,  
92 2014; Overgaard et al., 2006; Pedersen et al., 2011; Riz et al., 2014; Røge et al., 2017; Salinari  
93 et al., 2011; Tura et al., 2001). These models consist of blood glucose and insulin, but not  
94 incretins (Bergman et al., 1979; Dalla Man et al., 2007, 2006; De Gaetano et al., 2013; Tura et  
95 al., 2001). Other mathematical models incorporate the incretins (Brubaker et al., 2007; Dalla  
96 Man et al., 2016; Kabul et al., 2015; Kim et al., 2014; Pedersen et al., 2011). In some models,  
97 blood glucose and incretin act independently on insulin secretion during the OGTT (Brubaker et  
98 al., 2007; Kabul et al., 2015; Kim et al., 2014); in others, blood glucose and incretin act  
99 cooperatively (Dalla Man et al., 2016; Pedersen et al., 2011). The effective action of incretins on  
100 the insulin secretion in mathematical models remains to be determined.

101 One application of mathematical models is the ability to make prediction. Published  
102 mathematical models of blood glucose and insulin have been used to predict blood glucose

103 levels after glucose administration. We require a solution of a pair of forward and inverse  
104 problems to obtain an optimal design of input pattern. Firstly, we need a dynamics model to  
105 predict the temporal pattern as a consequence of a given input pattern. This mode of prediction  
106 is a forward problem: The prediction is an “output pattern” related to the input pattern. Secondly,  
107 optimal input pattern should be determined so as to minimize the outcome that is defined as an  
108 arbitrarily given objective function of the predicted output pattern. This mode of prediction is an  
109 inverse problem: The prediction is an “input pattern” that produces an optimal output pattern.  
110 There are many established methods that use complex ordinary differential equations to solve  
111 the forward problem of predicting output patterns, but few methods exist to solve the inverse  
112 problem of predicting input patterns. Recently, we proposed a mathematical framework to  
113 estimate an input pattern that produces a defined output pattern (Murakami et al., 2017).

114 Here, we constructed mathematical models with either glucose-independent and/or  
115 glucose-cooperative roles of incretins on insulin secretion. We used the models to predict an  
116 optimal glucose ingestion pattern that controls blood glucose level. Because blood glucose level  
117 is the output pattern, this represents using the model to solve an inverse problem. We measured  
118 blood glucose, insulin, GIP and GLP-1 before and after oral glucose ingestion with different



119 doses and ingestion durations for three subjects. As a forward problem, we constructed a  
120 mathematical model of blood glucose (output) in response to orally ingested glucose (input) for  
121 each subject. As an inverse problem, we optimally designed glucose ingestion pattern that  
122 minimized the peak value of blood glucose level for each subject. Each subject had an  
123 optimized pattern of ingestion that was intermittent. We validated blood glucose level by the  
124 predicted intermittent ingestion pattern for each subject and found that the intermittent ingestion  
125 pattern decreased the peak value of blood glucose level compared with the blood glucose levels  
126 that occurred with bolus or 1 h-continuous ingestion patterns. Thus, we provide the logical  
127 design of oral glucose ingestion pattern that minimizes the peak value of blood glucose level in  
128 humans, using an approach of combination of a forward and an inverse problems, which can be  
129 widely applied to design optimal dietary ingestion patterns for human health.

## 130 **RESULTS**

### 131 **Measurement of Blood Glucose and Blood Hormones Before and After Oral Glucose**

#### 132 **Ingestion**

133 To obtain the data for developing the model, we monitored the effect of ingestion of different  
134 amounts of glucose in different temporal patterns of ingestion on blood glucose and hormone

135 levels (Figure 1). In 6 separate experiments, the three healthy volunteers either rapidly  
136 consumed one of three doses of glucose (25 g, 50 g, 75 g) or consumed the glucose over 2 hours  
137 (see STAR Methods A.1, A.2). The rapid ingestion paradigm is referred to as bolus ingestion  
138 and the slow ingestion paradigm as 2 h-continuous ingestion. Prior to glucose ingestion and  
139 after glucose ingestion, we measured levels of blood glucose, insulin, C-peptide, intact GIP  
140 (designated GIP hereafter), and intact GLP-1 (designated GLP-1 hereafter) (see STAR Methods  
141 A.2).

142 With any ingestion pattern, the temporal pattern of each molecule exhibited a transient  
143 increase that returned to baseline within 4 hours (Figure 2). For bolus ingestion, the blood  
144 glucose and other blood hormones reached similar peak values for each dose of ingested  
145 glucose (Figure 2A, C, E, G, I). For the 2 h-continuous ingestion, blood glucose and other blood  
146 hormones showed increasing peak values with increasing doses of ingested glucose (Figure 2B,  
147 D, F, H, J). A consistent difference between bolus and continuous ingestion was that in the bolus  
148 ingestion case, with increasing doses of glucose, the time when blood glucose and hormones  
149 began to decrease and time to return to baseline become more delayed. In contrast, for 2  
150 h-continuous ingestion, the time when blood glucose and other hormones began to decrease,

151 and the time when all returned to the basal level were similar regardless of dose of ingested  
152 glucose. Subjects #2 and #3 showed similar responses to subject #1 by bolus and 2 h-continuous  
153 ingestion, except for GLP-1 (Figure S1). GLP-1 for only 75 g bolus ingestion for subject #1  
154 showed a high transient peak, but that for subjects #2 and #3 did not.

### 155 **Mathematical Model of Blood Glucose Control**

156 As a solution to the forward problem, we constructed a mathematical model of blood glucose  
157 control that fits time course data of blood glucose and hormones. We constructed a  
158 mathematical model from ordinary differential equations (Figure 3A, Table 1, Table S1, see  
159 STAR Methods B.1). Because of possible alternative mechanisms of actions of GIP and GLP-1  
160 on insulin secretion (Brubaker et al., 2007; Dalla Man et al., 2016; Kabul et al., 2015; Kim et al.,  
161 2014; Pedersen et al., 2011), we constructed multiple alternative models in which the GIP or  
162 GLP-1 or both have independent actions or cooperative actions with blood glucose to promote  
163 insulin secretion (Figure 3A, Table 1, Table S1, see STAR Methods B.1). We estimated  
164 parameters of each model for each subject separately to fit time course data of blood glucose  
165 and hormones. We selected the best model of blood glucose control for each subject by Akaike  
166 Information Criterion (AIC) ( see STAR Methods B.2). The selected models were the same for

167 subjects #1 and #3, but different from the model for subject #2 (Table S2, S3). In the models of  
168 subject #1 and #3, cooperative action by blood glucose and GIP was selected, indicating that  
169 insulin secretion did not depend on GLP-1. In the model of subject #2, the independent action of  
170 GIP and Cooperative action by blood glucose and GLP-1 were selected. In each subject model,  
171 time course data of each blood glucose and hormones were approximately reproduced (Figure  
172 3B, Figure S2, S3, Table S4).

173 **Optimization and Validation of Glucose Ingestion Pattern that Minimizing Peak Value of**  
174 **Blood Glucose Level**

175 Using mathematical, we tackled the inverse problem of predicting an optimal input pattern  
176 that optimally controls the output pattern. Here, input and output patterns are, specifically, time  
177 courses of oral glucose ingestion and blood glucose level, respectively. The optimality of the  
178 output pattern is defined as an objective function that is a function of the output pattern,  
179 typically the peak value of blood glucose level. First, we optimized the glucose ingestion pattern  
180 for each subject that minimized the typical objective function. Hereafter, we designate the  
181 optimized patterns minimizing objective function as the minimization pattern. We searched the  
182 solution under the following restrictions; total 50 g of glucose should be ingested within 60 min,

183 glucose is ingested every 5 min, at least 1 g is ingested at 0 min and the remaining 49 g of  
184 glucose is distributed between 0 and 60 min. Because the combination of glucose ingestion  
185 patterns is enormous ( $62!/(49!13!)$ ), we obtained an optimal ingestion pattern using an  
186 evolutionary programming-based optimization algorithm (see SART Methods B.3) (Bäck and  
187 Schwefel, 1993). The minimization patterns for the three subjects were designed with the  
188 above-explained method and shown in Fig. 4A.

189 The optimized minimization pattern of the subject #1 appeared to be an intermittent pattern  
190 with 30-min intervals with most glucose ingested at 0 min (17 g) and 60 min (23 g), and smaller  
191 amounts ingested at 30 min (8 g) and 35 min (2 g) (Figure 4A, Table S5). This pattern was  
192 different from bolus and 1 h-continuous ingestions. The predicted blood glucose achieved with  
193 the minimization pattern showed a bimodal temporal pattern with peaks from ~25 min to 50 min  
194 and at ~80 min (Figure 4B, red line).

195 The optimized minimization patterns of subjects #2 and #3 appeared to be intermittent  
196 patterns similar to the pattern of the subject #1 (Figure 4A; Table S5). Compared with subject  
197 #1, for subjects #2 and #3, the optimized pattern of ingestion had some notable differences:  
198 Ingestion amount of glucose at 0 min was less, the number of time points at ~30-min the

199 intermittent period during which glucose was ingested was larger, and the ingestion amount of  
200 glucose at 60 min was larger. The predicted blood glucose level achieved with the minimization  
201 pattern for subjects #2 and #3 showed a similar bimodal pattern to that for subject #1 (Figure 4B,  
202 red line).

203 We also compared the simulated blood glucose levels produced with the minimization pattern  
204 with those simulated for bolus or 1 h-continuous ingestion of 50 g of glucose. The predicted  
205 minimization pattern produced a lower peak value of blood glucose level than either simulations  
206 of bolus or 1 h-continuous ingestion using the subject-specific models (Figure 4B).

207 We validated the predicted blood glucose levels produced with the minimization patterns for  
208 each subject. Each subject ingested glucose according to their specific optimized minimization  
209 pattern (Table S5), and blood glucose levels were measured. (Figure 4C, red line). The peak  
210 value of blood glucose level produced by ingestion according to the minimization pattern in  
211 each subject was less than those produced by bolus and 1 h-continuous ingestion (Figure 4C,  
212 Table S6). All subjects exhibited bimodal temporal patterns of blood glucose level. These  
213 experimental results are consistent with the predictions except that first peak in blood glucose  
214 level at ~30 min was lower than the second peak at ~80 min for subjects #1 and #2 and the peak

215 in blood glucose was delayed from the prediction for subject #3.

216 To examine how the key parts of the ingestion pattern that resulted in the pattern that  
217 minimized the peak value of blood glucose level, we simplified the ingestion pattern into a  
218 coarse-grained ingestion pattern (Figure 5). We generated a minimization pattern with 5  
219 parameters (Figure 5A, see STAR Methods B.4), and examined the effect of parameters on the  
220 peak value of blood glucose level.

221 We coarse-grained the minimization pattern into three periods; start time (0 min) of the first  
222 bolus ingestion, continuous-like intermediate period, and the end time of the ingestion (Figure  
223 5A, upper panel). The coarse-grained pattern was characterized by 5 parameters; the dose of  
224 ingested glucose at 0 min  $u_0$ , the start time of the intermediate period  $t_s$ , the duration of  
225 intermediate period  $\Delta t$ , the dose of ingested of glucose at the end time  $u_T$ , and the end time of  
226 the ingestion  $T$  (Figure 5A, see STAR Methods B.4). We changed the parameters, and  
227 examined the effect of each parameter on the peak value of blood glucose level (Figure 5B).

228 To determine the parameter sets of the coarse-grained minimization pattern, we fixed  $T = 60$   
229 [min], the same duration as Figure 4A, and identified the parameter set that minimized the  
230 peak value of blood glucose level of subject #1 (Figure 5B, larger symbols). The parameter set

231  $u_0 = 17$  [g],  $u_{60} = 24$  [g],  $t_s = 30$  [min],  $\Delta t = 0$  [min] produced a minimum (174.07  
232 mg/dL) value for the peak value of blood glucose level, and this value is equivalent to that  
233 (173.95 mg/dL) achieved with the minimization pattern (Table 2). The coarse-grained  
234 minimization pattern was almost the same as that of the minimization pattern of subject #1  
235 obtained in Figure 4. This result indicates that the coarse-grained minimization pattern  
236 captures essential characteristics of the minimization pattern, such as the peak value of blood  
237 glucose level and the temporal pattern.

238 We examined the dependency of the parameters on the end time of ingestion  $T$  for  
239 minimizing the peak value of blood glucose level (Figure 5B, top). When  $T \leq 40$  [min],  
240  $u_0 + u_T = 50$  [g], and, as  $T$  increases  $u_0$  increases (Figure 5B, red line), and  $u_T$  decreases  
241 (Figure 5B, green line). Thus, when the total ingestion time is within 40 min, (i) there is no  
242 intermediate period, and (ii) as the total ingestion time increases, the dose of ingested glucose at  
243 0 min increases and the dose of ingested glucose at the end time decreases. When  $T > 40$   
244 [min], both  $u_0$  and  $u_T$  decrease as  $T$  increases, and the dose of ingested glucose at the  
245 intermediate period  $50 - u_0 - u_T$  increases almost linearly (Figure 5B, blue line). Thus, as the  
246 total ingestion time is longer than 40 minutes, (i) the dose of ingested glucose both at 0 min and



247 at the end time decrease and (ii) the dose ingested during the intermediate period increases. Also,  
248 when  $T > 40$  [min],  $t_s$  is almost constant between 20 [g] and 30 [g] (Figure 5B, magenta  
249 line).  $\Delta t$  is nearly 0 [min] when  $T \leq 60$  [min], and increases almost linearly when  $T > 60$   
250 [min] (Figure 5B, cyan line). Together these simulations indicated that, when the total ingestion  
251 time is shorter than 60 min, the duration of the intermediate period becomes so short that  
252 ingestion becomes bolus-like, and the intermediate period becomes longer as the total ingestion  
253 time is longer than 60 min. For subjects #2 and #3, the dependency of the parameters on the end  
254 time of ingestion  $T$  was also qualitatively the same (Figure 5B, middle and bottom).

255 Changing the duration of intermediate period  $\Delta t$  caused the greatest differences among the  
256 subjects (Figure S4). When  $T = 60$  [min], the duration of the intermediate period of subject #  
257 1 is shorter than those of subject #2 and #3, which was also shown in non-coarse-grained  
258 minimization patterns for the subjects (see Figure 4). For both subjects #2 and #3, as the total  
259 ingestion time becomes shorter than 60 min, the duration of the intermediate period becomes  
260 shorter and ingestion becomes bolus-like as for subject #1 (Figure 5B, Figure S4). Thus, the  
261 length of the total ingestion time is predicted to control the duration of the intermediate period  
262 among the subjects with all subjects exhibiting a point at which a bolus-like ingestion occurs

263 during the intermediate period.

264 The quantitative difference of duration of intermediate period among subjects may relate to  
265 differences in glucose tolerance among subjects. Glucose tolerance is determined by the balance  
266 between insulin secretion, sensitivity, and clearance; as glucose tolerance decreases, insulin  
267 secretion, sensitivity, and clearance also decrease (Antuna-Puente et al., 2011; Ohashi et al.,  
268 2018, 2015; Polidori et al., 2016; Schofield and Sutherland, 2012). Therefore, we examined the  
269 effect of the parameters for the reaction rates for insulin secretion, sensitivity and clearance on  
270 duration of the intermediate period (Figure S5). The models for each subject showed that the  
271 duration of the intermediate period becomes longer as the insulin secretion or sensitivity  
272 increase and becomes shorter as the insulin clearance increases. Thus, the duration of the  
273 intermittent period does not correspond to these insulin-related parameters controlling glucose  
274 tolerance.

## 275 **DISCUSSION**

### 276 **Prediction and Validation of Glucose Ingestion Patterns that Minimize the Peak Value of**

#### 277 **Blood Glucose Level**

278 In this study, as a forward problem, we constructed a mathematical model of the change in

279 blood glucose from time course data of blood glucose and hormones in blood during and  
280 following oral glucose ingestion with various doses and durations in human subjects. Using this  
281 model, as an inverse problem, we optimized glucose ingestion patterns that minimize the peak  
282 value of blood glucose level and validated these patterns with the human subjects by  
283 experiments. The minimization pattern was an intermittent pattern different from both the bolus  
284 ingestion and the continuous ingestion. This intermittent ingestion pattern was intuitively not  
285 obvious. However, we discovered the pattern using this approach of both constructing a  
286 mathematical model as a forward problem and optimizing input pattern from the model as an  
287 inverse problem. Although the best fitting model for each subject had important differences in  
288 the roles of the blood hormones, the intermittent pattern as an optimal ingestion pattern to  
289 minimize peak value of blood glucose level was common to all three subjects, suggesting that  
290 the minimization pattern is robust to these differences in the model. Although we determined  
291 that the duration of the intermittent period was a key parameter controlling the minimization  
292 pattern output, we did not determine a molecular mechanism for how the intermittent pattern  
293 minimizes the peak value of blood glucose level. This question will be analyzed in the future.

294 Methodologically, construction of a mathematical model based on the experimental data as a

295 forward problem is well-known. However, the inverse problem of optimizing an input pattern  
296 to achieve a specified output pattern is challenging (Murakami et al., 2017). Our success in  
297 identifying optimal input patterns through analysis of both the forward problem and inverse  
298 problem suggests that this approach is valid for biological systems. An obvious potential  
299 application is designing optimal ingestion patterns for various nutrients or combinations of  
300 nutrients such that the ingestion pattern that minimizes the peak value of blood glucose level  
301 can be logically designed. Such logical design of optimal food ingestion pattern will contribute  
302 the human metabolic care and the prevention of the type 2 diabetes. Here, the objective  
303 function for which we predict the input pattern is the peak value of the blood glucose level. By  
304 changing the objective function, this approach can evaluate other biological outputs and  
305 predict the input pattern that optimizes molecular concentrations or other measurable factors.

### 306 **Identification of Individualized Models of the Control of Blood Glucose Level**

307 Our ordinary differential equation models include the roles of incretins in insulin secretion.  
308 By determining the best fitting model for each subject, we observed differences between  
309 subjects in the roles of incretins in regulating blood glucose level. None of the subjects had  
310 models that included an independent effect of GLP-1 on insulin secretion. Two of the three

311 subjects had no role for GLP-1 (independent or cooperative with glucose) in their optimal  
312 models. In previous mathematical models using Caucasians data, only GLP-1, but not GIP, were  
313 incorporated (Dalla Man et al., 2016; Pedersen et al., 2011). It has been reported that secretion  
314 of intact GLP-1 in Japanese is very small, although that of the total GLP-1 in Japanese is almost  
315 the same as that in Caucasians (Seino et al., 2010). All subjects in this study are Japanese, and,  
316 the intact GIP level was higher than the intact GLP-1 level for all of them (Figure 2). Intact  
317 GLP-1 and intact GIP have a similar  $EC_{50}$  for their receptors: The  $EC_{50}$  of intact GIP is 8 nM  
318 (Gespach et al., 1984), and the  $EC_{50}$  of intact GLP-1 is 2.6 nM (Adelhorst et al., 1994).  
319 Considering the higher level of intact GIP than intact GLP-1 in the blood and their similar  
320 sensitivities, it is reasonable that intact GIP rather than intact GLP-1 was the incretin with the  
321 most effect on insulin secretion in the best fitting model.

322 Many mathematical models use average values of blood glucose from many subjects of all  
323 subjects. Some models that use data from individual subjects used data with only a single dose  
324 of glucose (Dalla Man et al., 2013; De Gaetano et al., 2013; Ohashi et al., 2018, 2015). Here,  
325 we used data from individual subjects using 3 different doses and 2 different durations of  
326 glucose ingestion. We constructed a mathematical model using a single dose of glucose (75 g,

327 like that of the OGTT) in subject #1 and compared this OGTT model with the model that we  
328 constructed from the data for the 3 different doses and 2 different durations of glucose ingestion  
329 (Figure S6). The model that used the multiple dose and ingestion durations had a better fit to the  
330 blood glucose level achieved by ingestion of glucose according to the minimization pattern  
331 (lower *RSS* value) than did the model using 75 g OGTT alone. Thus, the single dose OGTT  
332 appears insufficient to reflect the dynamics of the blood glucose level in sufficient detail for  
333 mathematical modeling, and models should be constructed from data on multiple doses and  
334 durations of glucose ingestion to be useful in predicting the minimization pattern.

335 This finding that more training data provides more accurate predictive power is expected.  
336 However, the number of conditions for training data sets is limited in humans, because these  
337 types of studies take a long period of time and require several hours and fasting by the  
338 participants for each experimental condition. Here, we set an interval of 1 to 2 months for each  
339 experiment, thus collecting the data required a minimum of six months, and, in reality, more  
340 than a year. During such a long period, having many subjects for blood sampling following oral  
341 glucose ingestion every month over a year is difficult. Changes in the state of a subject can  
342 change during the months of the experiment, which can affect the model and reduce predictive

343 power. Thus, in human subject tests, there is a trade-off relationship between the number of  
344 training data sets and the prediction accuracy.

345 A limitation of the study is that the model is limited. There are mechanisms, such as glucagon,  
346 autonomic nerves, and free fatty acids, that did not incorporate into the model. Glucagon is a  
347 counter-acting hormone to insulin in regulation of blood glucose. Glucagon increases blood  
348 glucose level by facilitating glycogenolysis (Alberti and Zimmet, 1998; Jiang and Zhang, 2003).  
349 Autonomic nerves not only regulates secretion of insulin and glucagon (Thorens, 2011), but also  
350 affects hepatic glucose production and uptake (Kimura et al., 2016; Ruud et al., 2017). Free  
351 fatty acids weakens the effect of insulin on hepatic glucose production and peripheral glucose  
352 uptake (Okuno et al., 1998; Yamauchi et al., 2001). Although glucagon and free fatty acid are  
353 not explicitly incorporated in our model, blood glucose levels and other hormone concentrations  
354 are well reproduced, which may suggest that the effects of other molecules such as glucagon  
355 and free fatty acid, are implicitly incorporated by some parameters in the model. Incorporating  
356 glucagon and free fatty acid explicitly into the model is a future goal.

357 In conclusion, the key points of this study are three. The first point is the experimental design.  
358 We performed six different conditions of oral glucose ingestion (3 doses and 2 durations) for

359 each subject and obtained detailed time course data, which makes the model predictable. The  
360 second point is the demonstration of ability to logically design blood glucose control. We  
361 predicted and validated the oral glucose ingestion pattern that minimized the peak value of  
362 blood glucose level. The third point is the methodology. We solved a forward problem by  
363 constructing the mathematical model of output with the given input patterns, and in turn, solved  
364 an inverse problem by logical designing the input pattern to control the output pattern. We  
365 expect that this approach with a forward problem and an inverse problem that are solved using  
366 the mathematical model can be widely applied to design optimal dietary ingestion pattern  
367 relevant to human health.  
368



369 **STAR★Methods**

370 Detailed methods are provided in the online version of this paper and include the following:

371 **●METHOD DETAILS**

372 ○A. Experiment

373 ○B. Model and Analysis

374 **SUPPLEMENTAL INFORMATION**

375 Supplemental Information includes eight figures and seven tables.

376 **AUTHOR CONTRIBUTIONS**

377 Conceptualization and Methodology, M.F., Y.M., S.O. and S.K.;

378 Experiment, Y.K., Y.S., and S.F.;

379 Modeling and Simulation, M.F., and Y.M.;

380 Analysis, M.F., Y.M., M.K., S.U., H.K., H.I., K.K., S.O., S.I, S.K.;

381 Writing, M.F., Y.M., Y.K., and S.K.;

382 Supervision and Funding, S.I. and S.K.

383 **ACKNOWLEDGEMENT**

384 We thank fellow laboratory members for critical reading of the manuscript and for technical

385 assistance with the experiment and analysis. We thank Rika Sumita, Mina Shiguma, and Naomi  
386 Isene for technical assistance. We thank Nancy R. Gough (BioSerendipity, LLC) for editing the  
387 manuscript. The computations for this work were performed in part on the NIG supercomputer  
388 system at ROIS National Institute of Genetics. This work was supported by the Creation of  
389 Fundamental Technologies for Understanding and Control of Biosystem Dynamics  
390 (JPMJCR12W3), CREST, of the Japan Science and Technology Agency (JST) and by the Japan  
391 Society for the Promotion of Science (JSPS) KAKENHI Grant Number (17H06300, 17H6299,  
392 18H03979). M.F. receives funding from a Grant-in-Aid for Challenging Exploratory Research  
393 (16K12508). Y.K. receives funding from a Grant-in-Aid for Young Scientists (18K16578). S.U.  
394 receives funding from a Grant-in-Aid for Scientific Research on Innovative Areas (16H01551)  
395 and a Grant-in-Aid for Scientific Research on Innovative Areas (18H04801). H.K. receives  
396 funding from a Grant-in-Aid for Scientific Research on Innovative Areas (16H06577). K.K.  
397 receives funding from a Grant-in-Aid for Scientific Research (B) (15KT0021) and (C)  
398 (15K00246), and a Grant-in-Aid for Scientific Research on Innovative Areas (16H01554). The  
399 funders had no role in study design, data collection and analysis, decision to publish, or  
400 preparation of the manuscript.

401

402 **REFERENCES**

- 403 Abdul-Ghani, M. a., Tripathy, D., DeFronzo, R.A., 2006. Contributions of beta-cell dysfunction  
404 and insulin resistance to the pathogenesis of impaired glucose tolerance and impaired  
405 fasting glucose. *Diabetes Care* 29, 1130–9. doi:10.2337/diacare.2951130
- 406 Adelhors, K., Hedegaard, B.B., Knudsen, L.B., Kirk, O., 1994. Structure-activity studies of  
407 glucagon-like peptide-1. *J. Biol. Chem.* 269, 6275–8.
- 408 Alberti, K.G., Zimmet, P.Z., 1998. Definition, diagnosis and classification of diabetes mellitus  
409 and its complications. Part 1: diagnosis and classification of diabetes mellitus provisional  
410 report of a WHO consultation. *Diabet. Med.* 15, 539–53.  
411 doi:10.1002/(SICI)1096-9136(199807)15:7<539::AID-DIA668>3.0.CO;2-S
- 412 Antuna-Puente, B., Disse, E., Rabasa-Lhoret, R., Laville, M., Capeau, J., Bastard, J.-P., 2011.  
413 How can we measure insulin sensitivity/resistance? *Diabetes Metab.* 37, 179–88.  
414 doi:10.1016/j.diabet.2011.01.002
- 415 Bäck, T., Schwefel, H.-P., 1993. An Overview of Evolutionary Algorithms for Parameter  
416 Optimization. *Evol. Comput.* 1, 1–23. doi:10.1162/evco.1993.1.1.1
- 417 Bell, G.I., Santerre, R.F., Mullenbach, G.T., 1983. Hamster preproglucagon contains the  
418 sequence of glucagon and two related peptides. *Nature* 302, 716–8. doi:10.1038/302716a0
- 419 Bergman, R.N., Ider, Y.Z., Bowden, C.R., Cobelli, C., 1979. Quantitative estimation of insulin  
420 sensitivity. *Am. J. Physiol.* 236, E667-77. doi:10.1172/JCI112886
- 421 Brubaker, P.L., Ohayon, E.L., D'Alessandro, L.M., Norwich, K.H., 2007. A mathematical  
422 model of the oral glucose tolerance test illustrating the effects of the incretins. *Ann.*  
423 *Biomed. Eng.* 35, 1286–1300. doi:10.1007/s10439-007-9274-1
- 424 Cahill, G.F., 2006. Fuel metabolism in starvation. *Annu. Rev. Nutr.* 26, 1–22.  
425 doi:10.1146/annurev.nutr.26.061505.111258
- 426 Castillo, M.J., Scheen, A.J., Letiexhe, M.R., Lefèbvre, P.J., 1994. How to measure insulin  
427 clearance. *Diabetes. Metab. Rev.* 10, 119–50.
- 428 Dalla Man, C., Camilleri, M., Cobelli, C., 2006. A system model of oral glucose absorption:  
429 validation on gold standard data. *IEEE Trans. Biomed. Eng.* 53, 2472–8.  
430 doi:10.1109/TBME.2006.883792

- 431 Dalla Man, C., Micheletto, F., Sathananthan, M., Vella, A., Cobelli, C., 2016. Model-Based  
432 Quantification of Glucagon-Like Peptide-1-Induced Potentiation of Insulin Secretion in  
433 Response to a Mixed Meal Challenge. *Diabetes Technol. Ther.* 18, 39–46.  
434 doi:10.1089/dia.2015.0146
- 435 Dalla Man, C., Piccinini, F., Basu, R., Basu, A., Rizza, R. a, Cobelli, C., 2013. Modeling  
436 hepatic insulin sensitivity during a meal: validation against the euglycemic  
437 hyperinsulinemic clamp. *Am. J. Physiol. Endocrinol. Metab.* 304, E819-25.  
438 doi:10.1152/ajpendo.00482.2012
- 439 Dalla Man, C., Raimondo, D.M., Rizza, R. a., Cobelli, C., 2007. GIM, Simulation Software of  
440 Meal Glucose--Insulin Model. *J. Diabetes Sci. Technol.* 1, 323–330.  
441 doi:10.1177/193229680700100303
- 442 De Gaetano, A., Panunzi, S., Matone, A., Samson, A., Vrbikova, J., Bendlova, B., Pacini, G.,  
443 2013. Routine OGTT: a robust model including incretin effect for precise identification of  
444 insulin sensitivity and secretion in a single individual. *PLoS One* 8, e70875.  
445 doi:10.1371/journal.pone.0070875
- 446 Edelstein, S.L., Knowler, W.C., Bain, R.P., Andres, R., Barrett-Connor, E.L., Dowse, G.K.,  
447 Haffner, S.M., Pettitt, D.J., Sorkin, J.D., Muller, D.C., Collins, V.R., Hamman, R.F., 1997.  
448 Predictors of progression from impaired glucose tolerance to NIDDM: an analysis of six  
449 prospective studies. *Diabetes* 46, 701–10.
- 450 Fujimoto, W., Miki, T., Ogura, T., Zhang, M., Seino, Y., Satin, L.S., Nakaya, H., Seino, S.,  
451 2009. Niflumic acid-sensitive ion channels play an important role in the induction of  
452 glucose-stimulated insulin secretion by cyclic AMP in mice. *Diabetologia* 52, 863–872.  
453 doi:10.1007/s00125-009-1306-y
- 454 Gespach, C., Emami, S., Rosselin, G., 1984. Gastric inhibitory peptide (GIP), pancreatic  
455 glucagon and vasoactive intestinal peptide (VIP) are cAMP-inducing hormones in the  
456 human gastric cancer cell line HGT-1. Homologous desensitization of VIP receptor  
457 activity. *Biochem. Biophys. Res. Commun.* 120, 641–9.
- 458 Hill, K., Caprihan, A., Kakalios, J., 1997. Bulk Segregation in Rotated Granular Material  
459 Measured by Magnetic Resonance Imaging. *Phys. Rev. Lett.* 78, 50–53.  
460 doi:10.1103/PhysRevLett.78.50
- 461 Inagaki, N., Seino, Y., Takeda, J., Yano, H., Yamada, Y., Bell, G.I., Eddy, R.L., Fukushima, Y.,  
462 Byers, M.G., Shows, T.B., 1989. Gastric inhibitory polypeptide: structure and

- 463 chromosomal localization of the human gene. *Mol. Endocrinol.* 3, 1014–21.  
464 doi:10.1210/mend-3-6-1014
- 465 Jiang, G., Zhang, B.B., 2003. Glucagon and regulation of glucose metabolism. *Am. J. Physiol.*  
466 *Endocrinol. Metab.* 284, E671-8. doi:10.1152/ajpendo.00492.2002
- 467 Kabul, R.S.E., Kabul, E., Pratiwi, A., Setiawan, A.A., Dahlan, K., Kartono, A., 2015.  
468 Mathematical Model of Glucose-Insulin System Using the Modified Oral Minimal Model  
469 and the Incretin Effects. *Int. J. Pharm. Pharm. Sci.* 7, 451–454.
- 470 Kim, M., Oh, T.J., Lee, J.C., Choi, K., Kim, M.Y., Kim, H.C., Cho, Y.M., Kim, S., 2014.  
471 Simulation of oral glucose tolerance tests and the corresponding isoglycemic intravenous  
472 glucose infusion studies for calculation of the incretin effect. *J. Korean Med. Sci.* 29,  
473 378–85. doi:10.3346/jkms.2014.29.3.378
- 474 Kimura, K., Tanida, M., Nagata, N., Inaba, Y., Watanabe, H., Nagashimada, M., Ota, T.,  
475 Asahara, S., Kido, Y., Matsumoto, M., Toshinai, K., Nakazato, M., Shibamoto, T., Kaneko,  
476 S., Kasuga, M., Inoue, H., 2016. Central Insulin Action Activates Kupffer Cells by  
477 Suppressing Hepatic Vagal Activation via the Nicotinic Alpha 7 Acetylcholine Receptor.  
478 *Cell Rep.* 14, 2362–74. doi:10.1016/j.celrep.2016.02.032
- 479 Miyawaki, K., Yamada, Y., Ban, N., Ihara, Y., Tsukiyama, K., Zhou, H., Fujimoto, S., Oku, A.,  
480 Tsuda, K., Toyokuni, S., Hiai, H., Mizunoya, W., Fushiki, T., Holst, J.J., Makino, M.,  
481 Tashita, A., Kobara, Y., Tsubamoto, Y., Jinnouchi, T., Jomori, T., Seino, Y., 2002.  
482 Inhibition of gastric inhibitory polypeptide signaling prevents obesity. *Nat. Med.* 8,  
483 738–42. doi:10.1038/nm727
- 484 Murakami, Y., Koyama, M., Oba, S., Kuroda, S., Ishii, S., 2017. Model-based control of the  
485 temporal patterns of intracellular signaling in silico. *Biophys. physicobiology* 14, 29–40.  
486 doi:10.2142/biophysico.14.0\_29
- 487 Nakagami, T., DECODA Study Group, 2004. Hyperglycaemia and mortality from all causes  
488 and from cardiovascular disease in five populations of Asian origin. *Diabetologia* 47,  
489 385–394. doi:10.1007/s00125-004-1334-6
- 490 Ohashi, K., Fujii, M., Uda, S., Kubota, H., Komada, H., Sakaguchi, K., Ogawa, W., Kuroda, S.,  
491 2018. Increase in hepatic and decrease in peripheral insulin clearance characterize  
492 abnormal temporal patterns of serum insulin in diabetic subjects. *npj Syst. Biol. Appl.* 4,  
493 14. doi:10.1038/s41540-018-0051-6
- 494 Ohashi, K., Komada, H., Uda, S., Kubota, H., Iwaki, T., Fukuzawa, H., Komori, Y., Fujii, M.,

- 495 Toyoshima, Y., Sakaguchi, K., Ogawa, W., Kuroda, S., 2015. Glucose Homeostatic Law:  
496 Insulin Clearance Predicts the Progression of Glucose Intolerance in Humans. *PLoS One*  
497 10, e0143880. doi:10.1371/journal.pone.0143880
- 498 Okuno, A., Tamemoto, H., Tobe, K., Ueki, K., Mori, Y., Iwamoto, K., Umesono, K., Akanuma,  
499 Y., Fujiwara, T., Horikoshi, H., Yazaki, Y., Kadowaki, T., 1998. Troglitazone increases  
500 the number of small adipocytes without the change of white adipose tissue mass in obese  
501 Zucker rats. *J. Clin. Invest.* 101, 1354–61. doi:10.1172/JCI1235
- 502 Orskov, C., Wettergren, A., Holst, J.J., 1993. Biological effects and metabolic rates of  
503 glucagonlike peptide-1 7-36 amide and glucagonlike peptide-1 7-37 in healthy subjects are  
504 indistinguishable. *Diabetes* 42, 658–61.
- 505 Overgaard, R. V, Jelic, K., Karlsson, M., Henriksen, J.E., Madsen, H., 2006. Mathematical beta  
506 cell model for insulin secretion following IVGTT and OGTT. *Ann. Biomed. Eng.* 34,  
507 1343–54. doi:10.1007/s10439-006-9154-0
- 508 Parkes, D.G., Pittner, R., Jodka, C., Smith, P., Young, A., 2001. Insulinotropic actions of  
509 exendin-4 and glucagon-like peptide-1 in vivo and in vitro. *Metabolism*. 50, 583–589.  
510 doi:10.1053/meta.2001.22519
- 511 Pedersen, M.G., Dalla Man, C., Cobelli, C., 2011. Multiscale modeling of insulin secretion.  
512 *IEEE Trans. Biomed. Eng.* 58, 3020–3. doi:10.1109/TBME.2011.2164918
- 513 Polidori, D.C., Bergman, R.N., Chung, S.T., Sumner, A.E., 2016. Hepatic and Extrahepatic  
514 Insulin Clearance Are Differentially Regulated: Results From a Novel Model-Based  
515 Analysis of Intravenous Glucose Tolerance Data. *Diabetes* 65, 1556–64.  
516 doi:10.2337/db15-1373
- 517 Preitner, F., Ibberson, M., Franklin, I., Binnert, C., Pende, M., Gjinovci, A., Hansotia, T.,  
518 Drucker, D.J., Wollheim, C., Burcelin, R., Thorens, B., 2004. Gluco-incretins control  
519 insulin secretion at multiple levels as revealed in mice lacking GLP-1 and GIP receptors. *J.*  
520 *Clin. Invest.* 113, 635–645. doi:10.1172/JCI200420518
- 521 Riz, M., Pedersen, M.G., Toffolo, G.M., Haschke, G., Schneider, H.-C., Klabunde, T., Margerie,  
522 D., Cobelli, C., 2014. Minimal modeling of insulin secretion in the perfused rat pancreas: a  
523 drug effect case study. *Am. J. Physiol. Endocrinol. Metab.*  
524 doi:10.1152/ajpendo.00603.2013
- 525 Røge, R.M., Bagger, J.I., Alskär, O., Kristensen, N.R., Klim, S., Holst, J.J., Ingwersen, S.H.,  
526 Karlsson, M.O., Knop, F.K., Vilsbøll, T., Kjellsson, M.C., 2017. Mathematical Modelling

527 of Glucose-Dependent Insulinotropic Polypeptide and Glucagon-like Peptide-1 following  
528 Ingestion of Glucose. *Basic Clin. Pharmacol. Toxicol.* 38, 42–49. doi:10.1111/bcpt.12792  
529 Ruud, J., Steculorum, S.M., Brüning, J.C., 2017. Neuronal control of peripheral insulin  
530 sensitivity and glucose metabolism. *Nat. Commun.* 8, 15259. doi:10.1038/ncomms15259  
531 Salinari, S., Bertuzzi, A., Mingrone, G., 2011. Intestinal transit of a glucose bolus and incretin  
532 kinetics: a mathematical model with application to the oral glucose tolerance test. *Am. J.*  
533 *Physiol. Endocrinol. Metab.* 300, E955-65. doi:10.1152/ajpendo.00451.2010  
534 Sano, T., Kawata, K., Ohno, S., Yugi, K., Kakuda, H., Kubota, H., Uda, S., Fujii, M., Kunida,  
535 K., Hoshino, D., Hatano, A., Ito, Y., Sato, M., Suzuki, Y., Kuroda, S., 2016. Selective  
536 control of up-regulated and down-regulated genes by temporal patterns and doses of  
537 insulin. *Sci. Signal.* 9, ra112. doi:10.1126/scisignal.aaf3739  
538 Schofield, C.J., Sutherland, C., 2012. Disordered insulin secretion in the development of insulin  
539 resistance and Type 2 diabetes. *Diabet. Med.* 29, 972–9.  
540 doi:10.1111/j.1464-5491.2012.03655.x  
541 Schulze, M.B., Liu, S., Rimm, E.B., Manson, J.E., Willett, W.C., Hu, F.B., 2004. Glycemic  
542 index, glycemic load, and dietary fiber intake and incidence of type 2 diabetes in younger  
543 and middle-aged women. *Am. J. Clin. Nutr.* 80, 348–356. doi:10.1093/ajcn/80.2.348  
544 Seino, Y., Fukushima, M., Yabe, D., 2010. GIP and GLP-1, the two incretin hormones:  
545 Similarities and differences. *J. Diabetes Investig.* 1, 8–23.  
546 doi:10.1111/j.2040-1124.2010.00022.x  
547 Stumvoll, M., Mitrakou, A., Pimenta, W., Jenssen, T., Yki-Jarvinen, H., Van Haeften, T., Renn,  
548 W., Gerich, J., 2000. Use of the oral glucose tolerance test to assess insulin release and  
549 insulin sensitivity. *Diabetes Care* 23, 295–301. doi:10.2337/diacare.23.3.295  
550 Takeda, J., Seino, Y., Tanaka, K., Fukumoto, H., Kayano, T., Takahashi, H., Mitani, T., Kurono,  
551 M., Suzuki, T., Tobe, T., 1987. Sequence of an intestinal cDNA encoding human gastric  
552 inhibitory polypeptide precursor. *Proc. Natl. Acad. Sci. U. S. A.* 84, 7005–8.  
553 doi:10.1073/pnas.84.20.7005  
554 Tholen, D.W., Kallner, A.J., Kennedy, W., Krouwer, J.S., Meier, K., 2004. Evaluation of  
555 Precision Performance of Quantitative Measurement Methods; Approved Guideline.  
556 Thorens, B., 2011. Brain glucose sensing and neural regulation of insulin and glucagon  
557 secretion. *Diabetes. Obes. Metab.* 13 Suppl 1, 82–8.  
558 doi:10.1111/j.1463-1326.2011.01453.x

- 559 Tietz, N. (Ed.), 1990. *Clinical Guide to Laboratory Tests*, 2nd Edition. WB Saunders,  
560 Philadelphia.
- 561 Tijssen, P., 1985. *Practice and theory of enzyme immunoassays*. Elsevier, Amsterdam, NY.
- 562 Tura, a, Ludvik, B., Nolan, J.J., Pacini, G., Thomaseth, K., 2001. Insulin and C-peptide  
563 secretion and kinetics in humans: direct and model-based measurements during OGTT.  
564 *Am. J. Physiol. Endocrinol. Metab.* 281, E966-74.
- 565 Vollmer, K., Holst, J.J., Baller, B., Ellrichmann, M., Nauck, M. a, Schmidt, W.E., Meier, J.J.,  
566 2008. Predictors of incretin concentrations in subjects with normal, impaired, and diabetic  
567 glucose tolerance. *Diabetes* 57, 678–87. doi:10.2337/db07-1124
- 568 Yamauchi, T., Kamon, J., Waki, H., Murakami, K., Motojima, K., Komeda, K., Ide, T., Kubota,  
569 N., Terauchi, Y., Tobe, K., Miki, H., Tsuchida, A., Akanuma, Y., Nagai, R., Kimura, S.,  
570 Kadowaki, T., 2001. The mechanisms by which both heterozygous peroxisome  
571 proliferator-activated receptor gamma (PPARgamma) deficiency and PPARgamma  
572 agonist improve insulin resistance. *J. Biol. Chem.* 276, 41245–54.  
573 doi:10.1074/jbc.M103241200  
574  
575



576 **STAR★Methods**

577 **KEY RESOURCE TABLE**

| REAGENT or RESOURCE                                              | SOURCE    | IDENTIFIER      |
|------------------------------------------------------------------|-----------|-----------------|
| Software and Algorithms                                          |           |                 |
| Ordinary Differential Equation Simulations and Analysis - MATLAB | Mathworks | RRID:SCR_001622 |

578 **METHOD DETAILS**

579 **A. Experiment**

580 ***A.1. Subjects***

581 The subjects' profiles are as shown in Table S7. All subjects are healthy, and signed informed  
582 consent.

583 ***A.2. Blood Sampling Experiment***

584 For oral glucose tolerance test, a glucose solution containing 25 g, 50 g or 75 g glucose was  
585 orally ingested after a 10-hour fasting, and blood samples were obtained at the times indicated  
586 in the figures from the cutaneous vein of the forearm. Blood samples were obtained from the  
587 cutaneous vein of the forearm. Blood collection on fasting was performed twice and then a

588 glucose solution containing 25 g, 50 g or 75 g glucose was orally ingested. The ingestion  
589 method was rapid within a minute (bolus ingestion), and continuous over the course of 2 hours  
590 (2 h-continuous ingestion). For continuous ingestion, we connected the tube to noncontact  
591 microdispenser robot (Mr. MJ; MECT Corporation) (Sano et al., 2016) and glucose solution was  
592 ingested from tube. To equalize the volume of ingested glucose solution, glucose solution,  
593 TRELAN-G75 (AJINOMOTO), was diluted with distilled water into a total volume 225 ml.  
594 Each amount of glucose and delivery paradigm was tested with each subject in experiments  
595 separated by at least 1 month. Blood was rapidly centrifuged, plasma glucose and hormone  
596 concentrations expect for GIP were measured according to the methods with LSI Medience Co.,  
597 Ltd. Plasma glucose was measured by enzymatic methods (IATRO LQ GLU). Plasma insulin  
598 and Serum C-peptide was measured by Chemiluminescent Immunoassay (Tholen et al., 2004;  
599 Tietz, 1990). Plasma intact GLP-1 and Plasma intact GIP were measured by ELISA kits  
600 (#EGLP-35K, Merck, Billerica, MA or #27201, Immuno-Biological Laboratories, Gunma,  
601 Japan, respectively) (Miyawaki et al., 2002; Tijssen, 1985). For simplicity, we refer to plasma  
602 glucose, plasma insulin, serum C-peptide, plasma intact GIP, and plasma intact GLP-1 as blood  
603 glucose, insulin, C-peptide, GIP, and GLP-1, respectively.

604 ***A.3. Validation Experiment***

605 For the validation experiment of the minimization pattern, we employed the same method as  
606 described in A.2 for the subject #1, and a Freestyle Libre continuous glucose monitoring system  
607 (FGM; Abbott Diabetes Care) for subjects #2 and #3. FGM reduces the invasive burden on the  
608 subjects because the subjects wear a sensor rather than requiring an indwelling needle for blood  
609 glucose monitoring. We performed the experiment after the subject had worn the sensors for at  
610 least two days. Each subject wore three sensors, and bolus ingestion, continuous ingestion for 1  
611 hour, ingestion of minimization pattern were carried out using the same sensors within two  
612 weeks. The results of the three sensors were averaged for each paradigm. Because FGM  
613 measures glucose level of the interstitial fluid rather than glucose level in the blood, the  
614 measured value reflects a delay of about 5 to 20 minutes (Figure S3) compared with the values  
615 obtained by blood collection.

616 ***A.4. Ethics Committee Certification***

617 We complied with Japan's Ethical Guidelines for Epidemiological Research, and the study as  
618 approved by the ethics committees of the Life-Science Committee of the University of Tokyo  
619 (16-265). Subjects were recruited by the related law.

620 **B. Model and Analysis**

621 ***B.1. Model Structure and Parameter Structure***

622 For each subject, we estimated parameters that reproduce the time course data of blood  
623 glucose, insulin, C-peptide, intact GIP, and intact GLP-1 of six glucose ingestion patterns,  
624 combinations of three doses (25 g, 50 g, and 75 g) and given by bolus and 2 h-continuous  
625 ingestion, using the following model (Equations 1–21, Table 1).

$$\frac{dIntest_G}{dt} = v_1 - v_6, \#(Equation 1)$$

$$\frac{dGIP}{dt} = v_2 + v_3, \#(Equation 2)$$

$$\frac{dGLP1}{dt} = v_4 + v_5, \#(Equation 3)$$

$$\frac{dRa_{gutG}}{dt} = v_6 - v_7, \#(Equation 4)$$

$$\frac{dG}{dt} = \frac{v_7}{V} + v_8 - v_9, \#(Equation 5)$$

$$\frac{dl}{dt} = v_{10} - v_{11}, \#(Equation 6)$$

$$\frac{dCP}{dt} = v_{10} - v_{12}, \#(Equation 7)$$

$$\frac{dX}{dt} = \frac{v_{11}}{k_{11}} - v_{13}, \#(Equation 8)$$

626 Equations 1-8 indicate differential equations reproducing time developments of glucose amount  
627 in the intestine  $Intest_G$  [g], GIP level  $GIP$  [pM], GLP-1 level  $GLP1$  [pM], rate of appearance

628 of ingested glucose amount into the blood  $Ra_{GutG}$  [g/min], blood glucose level  $G$  [mg/dL],  
629 insulin level  $I$  [pM], C-peptide  $CP$  [pM], and the insulin level acting on the regulation of  
630 glucose  $X$  (denoted as effective insulin concentration at target organs hereafter). Each variable  
631 is controlled by fluxes  $v_i$   $\{i = 1, \dots, 13\}$ . However, in Equation 5,  $v_7$  was divided by the  
632 constant  $V$  to convert the ingested glucose amount into the blood glucose level. Also in  
633 Equation 8,  $v_{11}$  was divided by  $k_{11}$  to render  $X$  dimensionless. Rendering  $X$  dimensionless  
634 enables the elimination of redundant parameters, and improves the accuracy of parameter  
635 estimation. The fluxes  $v_i$  are given by

$$v_1 = Glucose, \#(Equation 9)$$

$$v_2 = \frac{k_2 Intest_G}{K_2 + Intest_G}, \#(Equation 10)$$

$$v_3 = k_3 (GIP_B - GIP), \#(Equation 11)$$

$$v_4 = \frac{k_4 Intest_G}{K_4 + Intest_G}, \#(Equation 12)$$

$$v_5 = k_5 (GLP1_B - GLP1), \#(Equation 13)$$

$$v_6 = \frac{k_6 Intest_G}{K_6 + Intest_G}, \#(Equation 14)$$

$$v_7 = k_7 Ra_{GutG}, \#(Equation 15)$$

$$v_8 = \frac{k_8}{K_8 + X}, \#(Equation 16)$$

$$v_9 = k_9 G X, \#(Equation 17)$$

$$v_{10} = k_{10}(G + a GIP + b G GIP + c GLP1 + d G GLP1), \#(Equation 18)$$

$$v_{11} = \frac{k_{11} I}{K_{11} + I}, \#(Equation 19)$$

$$v_{12} = k_{12} CP, \#(Equation 20)$$

$$v_{13} = k_{13} X, \#(Equation 21)$$

636 (Table 1, Figure 3).

637  $v_1$  indicates the influx of ingested glucose into the intestine, given by dose of glucose ingestion

638 divided by the time duration of ingestion  $\Delta t$ , otherwise 0 (Equation 22). For rapid ingestion,

639 such as bolus ingestion, or for the ingestion of minimization pattern,  $\Delta t$  is assumed as 0.5

640 [min]. For example, in the case of 50 g bolus,

$$Glucose = \begin{cases} \text{dose}/\Delta t = 50/0.5 = 100, & 0 \leq t < 0.5 \\ 0, & \text{otherwise} \end{cases} \#(Equation Error! Bookmark not defined.)$$

641  $v_2$  indicates the secretion of GIP depending on the glucose amount in the intestine ( $Intest_G$ ).

642  $v_3$  indicates absorption of GIP by the intestine and entry into the blood, which is proportional

643 to  $GIP$  subtracted by its basal  $GIP_B$ . At steady state without glucose ingestion,  $GIP$

644 converges to  $GIP_B$ .  $v_4$  indicates the secretion of GLP-1 depending on the glucose amount in

645 the intestine.  $v_5$  indicates the absorption of GLP-1 proportional to  $GLP1$  subtracted by its

646 basal  $GLP1_B$ . At the steady state without glucose ingestion,  $GLP1$  converges to  $GLP1_B$ .  $v_6$   
647 indicates the flow of glucose from the intestine to the rate of appearance ( $Ra_{GutG}$ ). With bolus  
648 ingestion, this flow can be regarded as constant because of the large amount of glucose in the  
649 intestine (Brubaker et al., 2007). Therefore, we assumed that this flux is given by the  
650 Michaelis-Menten equation, which saturates when the glucose amount is large.  $v_7$  indicates the  
651 flow of glucose from the rate of appearance into the blood, which is proportional to the rate of  
652 appearance of ingested glucose amount.  $v_8$  indicates the flow of glucose production from the  
653 liver into the blood, given by an inhibitory Michaelis-Menten equation, which decreases as the  
654 amount of effective insulin  $X$  increases.  $v_9$  indicates the glucose uptake from the blood to the  
655 periphery and is given by the product between blood glucose level  $G$  and effective insulin  $X$ .  
656  $v_{10}$  indicates the secretion of insulin. In this study, the actions of GIP and GLP-1 on insulin  
657 secretion were represented as independent actions of each incretin and as cooperative actions  
658 with blood glucose. By incorporating the parameters ( $a, b, c$ , and  $d$  in Equation 18), we could  
659 relate insulin secretion to cooperative or independent actions using AIC (Akaike Information  
660 Criteria) to select the model that best fit the data (Table S1, S2).  $v_{11}$  indicates the flow of  
661 insulin  $I$  into target organs, such as liver and muscle, leading to effective insulin  $X$ .  $v_{12}$

662 indicates inactivation of C-peptide  $CP$  and decreases in proportion to  $CP$  itself.  $v_{13}$  indicates

663 the binding of  $X$  to the cells in the target organs in proportion to  $X$  itself.

664 For the model, parameters were estimated for each subject. Here, the estimated parameters

665 are the 18 parameters of  $k_2, k_3, k_4, k_5, k_6, k_7, k_8, k_{10}, K_2, K_4, K_6, K_8, K_{11}, V, a, b, c$  and  $d$ ; and

666 six initial levels of  $GIP(0), GLP1(0), G(0), I(0), CP$  and  $X(0)$ . Using the variables, and

667 assuming  $Duod_G, Ra_{GutG}, GIP, GLP1, G, I, X$ , and  $CP$  are at steady state before ingestion,

668 other initial conditions and parameters were determined by estimated parameters and initial

669 values, given by

$$Ingest_G(0) = 0, \#(Equation\ 23)$$

$$Ra_{GutG}(0) = 0, \#(Equation\ 24)$$

$$k_9 = \frac{k_8}{G(0) \cdot X(0) \cdot (X(0) + K_8)}, \#(Equation\ 25)$$

$$k_{11} = k_{10} \frac{K_{11} + I(0)}{I(0)} (G(0) + a GIP(0) + b G(0)GIP(0) + c GLP1(0) + d G(0)GLP1(0)), \#(Equation\ 26)$$

$$k_{12} = \frac{k_{10}}{CP(0)} (G(0) + a GIP(0) + b G(0)GIP(0) + c GLP1(0) + d G(0)GLP1(0)), \#(Equation\ 27)$$

$$k_{13} = \frac{I(0) (I(0) + K_{11})}{X(0)}, \#(Equation\ 28)$$

$$GIP_B = GIP(0), \#(Equation\ 29)$$

$$GLP1_B = GLP1(0). \#(Equation\ 30)$$



670 These parameters are different between subjects, but the same for each subject for each  
671 experimental paradigm (dose and duration and ingestion). This means that the state for each  
672 subject does not change during this study. For time development, we used CVODE in Matlab's  
673 Systems biology toolbox.

674 We used the residual sum of squares as the objective function so that the residual between the  
675 experimental value and the simulation value is reduced, given by

$$RSS = \sum_i \sum_k \sum_t \left[ \frac{x_{i,k}^{sim}(t) - x_{i,k}^{exp}(t)}{\max_t x_{i,k}^{exp}(t) - \min_t x_{i,k}^{exp}(t)} \right]^2 . \#(Equation 31)$$

676  $x_{i,k}^{sim}(t)$  and  $x_{i,k}^{exp}(t)$  indicate the simulation values and the experimental values of molecular  
677 species  $k \in \{G, I, CP, GLP1, GIP\}$  at time  $t$  in the experiment  
678  $i \in \{25B, 25C, 50B, 50C, 75B, 75C\}$ , for which each experiment is denoted by the ingestion dose  
679 and the initial letters of the duration of ingestion, 25 g-bolus ingestion, 25B and for 75 g-2  
680 h-continuous, 75C. To avoid the influences of the differences in the absolute quantities of the  
681 molecules, we normalized the difference between the simulation value and the experimental  
682 value by the difference between the maximum value and the minimum value of the experiment.  
683 We performed parameter estimation for global optimal solution using Evolutionary  
684 programming (Bäck and Schwefel, 1993) for 40 trials with a parent number of 5000 and a

685 generation number of 5000, then we obtained a local optimal solution using the simplex search  
686 method (Matlab `fminsearch`). We implemented all programs using Matlab 2015a and performed  
687 parameter estimation using 2.6 GHz CPU (Xeon E5 2670) at the National Institute of Genetics  
688 (NIG), Supercomputer System of Research Organization of Information and System (ROIS).

## 689 ***B.2. Model Selection***

690 Using parameters of  $a, b, c$  and  $d$  in Equation 18, which indicate contributions to insulin  
691 secretion of incretins as independent actions of each incretin and cooperative actions with  
692 glucose, we considered the multiple models shown in Table S1.

693 We performed the parameter estimation of each of the above models using  $RSS$  of Equation  
694 31 for each subject. Here, we assumed that each residual of the simulation value and the  
695 experiment value in Equation 31 follows a normal distribution. Among the models to be  
696 compared, the sum  $N$  of the numbers of data of each variable measured in the experiment is  
697 the same. Therefore,  $AIC$  (Akaike Information Criteria), which is a criterion of model selection  
698 can be calculated for each model, given by

$$AIC = N \log(RSS) + 2K. \#(Equation 32)$$

699 We employed a model that minimizes  $AIC$  for each subject as a model representing the

700 dynamics of blood molecules in the subject. For the models not including GLP-1 of subjects #1  
701 and #3 as mentioned below, we also calculated  $AIC$  for each model similar to those including  
702 GLP-1.

703 The selected models for each subject were distinct (Table 2, Table S1, S2). For subject #1,  
704 the best model had no influence of GLP-1 and both an independent action and cooperative  
705 action with glucose for GIP (Table S2,  $c = d = 0$ ), indicating that the insulin secretion of  
706 subject #1 is independent of GLP-1. For subject #2, the best model had an independent action  
707 of GIP and a cooperative action of GLP-1 with glucose (Table S2,  $b = c = 0$ ), indicating that  
708 the insulin secretion of subject #2 depends on both GIP and GLP-1. For subject #3, the best  
709 model had only the cooperative action of GIP with glucose (Table S2,  $a = c = d = 0$ ),  
710 indicating that the insulin secretion of subject #3 is independent of GLP-1. In each subject  
711 model, time course data of each blood glucose and hormones were approximately reproduced  
712 (Figure 3B, Figure S2, S3).

713 In the selected models of subjects #1 and #3, insulin secretion did not depend on GLP-1,  
714 therefore, we performed parameter estimation and model selection using models that did not  
715 include GLP-1 by removing Equation 3. Insulin secretion using the best fitting of these models

716 for both subjects #1 and #3 included the term of independent action of blood glucose and the  
717 cooperative term of blood glucose and GIP (Table S3,  $a = 0$ ). We used these models for  
718 subjects #1 and #3.

### 719 ***B.3. Estimation of Minimization Patterns***

720 We set the oral glucose  $u(t)$  as a function of time  $t$  [min] according to the following  
721 constraint condition. First, glucose was orally ingested at intervals of 5 min from 0 min to 60  
722 min. Here, we defined  $u_s$  [g] as the dose of ingestion at the minute  $s$  [min] ( $s = 0, 5, \dots, 60$ )  
723 and  $u_{0,60}$  as the temporal pattern of oral glucose ingestion, given by

$$\mathbf{u}_{0,60} = [u_0, u_5, \dots, u_{60}]. \#(Equation\ 33)$$

724 Also, we set the total dose of glucose ingestion at 50 g, *i.e.*  $\sum_s u_s = 50$  [g], each dose at  $s$  is  
725 the integer value with unit of 1 g, *i.e.*  $u_s \in \mathbb{Z}, u_s \geq 0$ , and at least 1 g is ingested at 0 min to  
726 start the ingestion, *i.e.*  $u_0 \geq 1$ . We assumed that ingestion at each time is taken over 0.5 min,  
727 and convert  $u_{0,60}$  to *Glucose* instead of Equation 9, given by

$$Glucose(t) = \begin{cases} u_s/0.5 & t_i \leq t < t_i + 0.5, \\ 0 & \text{otherwise} \end{cases} \quad t_i \in \{0, 5, \dots, 60\}. \#(Equation\ 34)$$

728

729 Next, we expressed a nonlinear ordinary differential equation model (Equations 1–8)

730 describing the dynamics of the glucose metabolism system, given by

$$\frac{dx}{dt} = f(u(t), x(t); \theta), \#(Equation 35)$$

$$x(0) = x^{init}, \#(Equation 36)$$

731

732 where  $x$  indicates a state variable,  $x^{init}$  indicates an initial state,  $\theta$  is a parameter set, and  $f$

733 is a nonlinear function. These types and values of  $x$ ,  $x^{init}$ ,  $\theta$ , and  $f$  are different among

734 subjects, because the selected models of subjects and parameters are different among subjects

735 (see STAR Methods B.2). Each subject has one set of  $f$ ,  $x^{init}$ , and  $\theta$ .  $x(0:T)$ . The temporal

736 pattern of  $x$  from  $t = 0$  to  $t = T$  with the temporal pattern of oral glucose ingestion  $u_{0:60}$

737 can be obtained by the deterministic numerical simulation of this mathematical model  $Sim$ ,

738 given by

$$x(0:T) = Sim(u_{0:60}, x^{init}, \theta, f, T). \#(Equation 37)$$

739 To design a temporal pattern of oral glucose ingestion that minimizes the peak value of blood

740 glucose level, we formulated as an optimization problem. Defining the peak value of blood

741 glucose level in the time course  $x(0:T)$  as  $G_{Max}(x(0:T))$  and setting the objective function

742 of the optimization problem to be  $J(G_{Max}(x(0:T)))$ , we set the objective functions for

743 designing the temporal patterns of oral glucose ingestion that minimizes the peak value of blood

744 glucose level, given by

$$J(G_{Max}(\mathbf{x}(0:T))) = G_{Max}(\mathbf{x}(0:T)). \#(Equation 38)$$

745 Under these settings, the optimization problem of designing the oral glucose ingestion pattern

746 can be expressed as follows for minimizing the peak value of blood glucose level, given by

$$\underset{\mathbf{u}_{0:60}}{\operatorname{argmin}} J(G_{Max}(\mathbf{x}(0:T))) = \underset{\mathbf{u}_{0:60}}{\operatorname{argmin}} J(G_{Max}(\operatorname{Sim}(\mathbf{u}_{0:60}, \mathbf{x}^{init}, \boldsymbol{\theta}, \mathbf{f}, T))). \#(Equation 39)$$

747

748 We numerically solved this optimization problem by following evolutionary programming.

749 Each individual has an oral glucose ingestion pattern. After initialization of the oral glucose

750 ingestion pattern of each individual, the algorithm outputs the oral glucose ingestion pattern that

751 minimizes the objective function value by repeating (i) the mutation steps through which a new

752 oral glucose ingestion pattern for each individual is proposed, and (ii) the selection steps

753 through which individual (and thus new pattern) are selected based on the value of the objective

754 function.

755 Denoting the total number of individuals as  $N$ , the  $n^{\text{th}}$  individual of the oral glucose

756 ingestion pattern  $\mathbf{u}_{0:60}$  as  $\mathbf{u}_n$ , and simplifying the objective function as  $J(\mathbf{u}_n)$ , the algorithm

757 is as follows:

758 1. (**Initialization**) For each individual  $n = 1, \dots, N$ ,  $\mathbf{u}_n$  is initialized and  $\mathbf{u}_n$  that minimizes

759  $J(\mathbf{u}_n)$  is stored as  $\mathbf{u}^*$ .

760 2. Repeat the following procedure (a)–(c)  $K$  times

761 a. (**Mutation**) For each individual ( $n = 1, \dots, N$ ), copy and mutate  $\mathbf{u}_n$  to generate a

762 new individual  $\mathbf{u}'_n$ . Update  $\mathbf{u}^*$  as  $\mathbf{u}^* \leftarrow \mathbf{u}'_n$  if  $J(\mathbf{u}^*) > J(\mathbf{u}'_n)$ .

763 b. (**Selection 1**) For each of  $2N$  individuals that consist of the original individuals and

764 the new individuals generated at (a), obtain the evaluation value by the following

765 procedure.

766 i. Select an individual sequentially as  $\mathbf{u}_m$ .

767 ii. Select an  $M$  individuals randomly except for  $\mathbf{u}_m$  (duplication possible) as

768  $u_{m_i} (i = 1, \dots, M)$ .

769 iii. Obtain the evaluation value defined by the number of  $u_{m_i}$  with  $J(\mathbf{u}_{m_i}) >$

770  $J(\mathbf{u}_m)$ .

771 c. (**Selection 2**) Sort the individuals in order of the evaluation value, and the top  $N$

772 individuals are selected and used in the next step.

773 3. Output  $u^*$ .

774 In terms of evolutionary programming, step 1 is initialization, step 2-a is mutation, and steps 2-b  
775 and 2-c are selection. Because the intersection of oral glucose ingestion patterns is complicated  
776 by the constraint of 50 g total ingestion dose, this algorithm does not include intersection.

777 Details of initialization and mutation are as follows: In initialization, to avoid bias of an  
778 initial value,  $N$  individuals consist of an individual with a 50 g bolus ingestion, an individual  
779 with 1 g ingestion at 0 min and the remaining 49 g ingestion at 60 min, and other random  
780 patterns. The random pattern was generated by distributing 49 g glucose randomly with equal  
781 probability at each time point and the remaining 1 g ingestion at 0 min. For the mutation, a new  
782 oral glucose ingestion pattern was suggested by repeating operations that transfer 1 g of glucose  
783 from one time point to another randomly. Specific operations are as follows.

784 1. Subtract 1 g of glucose at time 0 min

785 2. Repeat the following procedure (a) and (b)  $L$  times

786 a. Randomly select the source and destination time points of glucose with equal  
787 probability.

788 b. If the ingestion glucose at the source time point contains more than 1 g, transfer 1 g of



789 glucose from the source time point to the destination time point.

790 3. Add 1 g of glucose at time 0 min

791 In the deterministic numerical simulation *Sim*, we employed the Euler method with a time  
792 step width of 0.001 [min] to shorten the calculation time. We also set  $T = 480$  [min].

793 In the evolutionary programming, we set the number of individuals as  $N = 500$ , the number  
794 of generation except initialization generation as  $K = 500$ , the number of transfers of glucose in  
795 one mutation  $L$  to decrease from  $L = 20$  by 1 every 25 generations, and the number of  
796 individuals for calculation of evaluation value in selection as  $M = N/5 = 100$ . According to  
797 this algorithm and these settings, we calculated the optimal ingestion pattern for 5 trials and  
798 obtained the pattern that produced the smallest objective function. Note that we obtained the  
799 same minimization pattern for each subject multiple times for multiple trials (all trials in subject  
800 #1 and #2, 2 trials in subject #3).

#### 801 ***B.4. Coarse Graining of Minimization Pattern***

802 We coarse-grained the minimization pattern into three periods: a start time (0 min) of the first  
803 bolus ingestion, a continuous-like intermediate period, and an end time of the ingestion (Figure  
804 5A, upper panel). The coarse-grained pattern was characterized by 5 parameters: the dose of

805 ingested glucose at 0 min  $u_0$  [g], the start time of the intermediate period  $t_s$  [min], the  
 806 duration of intermediate period  $\Delta t$  [min], the dose of ingested of glucose at the end time  $u_T$   
 807 [g], and the end time of the ingestion  $T$  [min]. Similar to Figure 4,  $t_s$  and  $\Delta t$  are multiples of  
 808 5 [min]. During the intermediate period ( $t_s$  to  $t_s + \Delta t$ ), the dose of glucose, determined by  
 809 subtracting  $u_0$  and  $u_T$  from 50 g, is equally distributed every 5 minutes. The dose of  
 810 ingestion during intermittent period is not limited to an integer. These are described as follows:

$$u_0 \in \{1, 2, \dots, 50\}, \#(\text{Equation 41})$$

$$u_T \in \{0, 1, \dots, 50 - u_0\}, \#(\text{Equation 42})$$

$$t_s \in \{5, 10, \dots, 55\}, \#(\text{Equation 43})$$

$$\Delta t \in \{0, \dots, T - t_s - 5\}, \#(\text{Equation 44})$$

811 and Equation 22 is replaced by

$$\text{Glucose} = \begin{cases} u_0/0.5, & 0 \leq t < 0.5 \\ \frac{50 - u_0 - u_T}{\Delta t/5 + 1}/0.5, & t_i \leq t < t_i + 0.5, t_i \in \{t_s, t_s + 5, \dots, t_s + \Delta t\} \\ u_T/0.5, & T \leq t < T + 0.5 \\ 0 & \text{otherwise} \end{cases} \#(\text{Equation 45})$$

812

813

## 814 **Figure Legends**

### 815 **Figure 1. Study diagram.**

816 Three subjects orally ingested glucose with 3 doses 75 g, 50 g and 25 g in 2 durations of bolus  
817 and 2 h-continuous ingestion. Time course data of blood glucose level, insulin level, C-peptide  
818 level, GIP level, and GLP-1 levels were obtained (Figure 2). We constructed models of the  
819 dynamics of these blood hormones and glucose for each subject as a forward problem (Figure 3).  
820 Using the models, we predicted the minimization pattern, the glucose ingestion pattern  
821 minimizing the peak value of blood glucose level for the ingestion of 50 g glucose within 60  
822 min as an inverse problem, and validated the pattern experimentally (Figure 4). To explore key  
823 parameters of the minimization pattern, we performed coarse-grain analysis (Figure 5).

824

### 825 **Figure 2. Time course data of blood glucose level and blood hormones in subject #1 by 826 glucose ingestion.**

827 (A, B) Blood glucose. (C, D) insulin. (E, F) C peptide. (G, H) intact GIP. (I, J) intact GLP-1. (A,  
828 C, E, G, I) Bolus ingestion. (B, D, F, H, J) 2 h-continuous ingestion. The doses are indicated in  
829 panel A.

830

### 831 **Figure 3. The blood glucose control model.**

832 (A) Model diagram. The letters in the circle indicate the variables of the model, the arrows  
833 indicate the flow of molecules, the red lines indicate activation, and the blue line indicates  
834 suppression (see STAR Methods B.1). The best fitting models for subjects #1 and #3 lack the  
835 GLP1 components. (B) Temporal patterns of hormones. The blue lines indicate the temporal  
836 patterns of simulations, and the red circles indicate the time course data of experiments. The  
837 dose and ingestion pattern are indicated at the top.

838

### 839 **Figure 4. Optimal Patterns minimizing the peak value of blood glucose level.**

840 (A) Minimization patterns for glucose ingestion that minimize the peak value of blood glucose  
841 level in subject #1, #2, and #3. (B) Temporal patterns of blood glucose simulated from ingestion  
842 of glucose according to the minimization pattern (red line), bolus ingestion (black solid line), or  
843 1 h-continuous ingestion (black broken line). The peak values achieved for each ingestion

844 pattern are marked with dashed horizontal lines. (C) Time course data of blood glucose level by  
845 the ingestion of the minimization pattern (red line and points and square symbols), the bolus  
846 ingestion (black solid line and open circles), and 1 h-continuous (black broken line and x  
847 symbols). The peak values achieved for each ingestion pattern are marked with dashed  
848 horizontal lines.

849

850 **Figure 5. Coarse-grain analysis of minimization pattern.**

851 (A) Coarse-grained minimization pattern characterized by 5 parameters, the dose of ingested  
852 glucose at 0 min  $u_0$ , the start time of the intermediate period  $t_s$ , the duration of intermediate  
853 period  $\Delta t$ , the dose of ingested of glucose at the end time  $u_T$ , and the end time of the ingestion  
854  $T$  (B)  $T$ -dependency of  $u_0$ ,  $u_{60}$ ,  $t_s$ , and  $\Delta t$  that realize the minimum value of peak value of  
855 blood glucose level for each subject..

856

857 **Tables**

858 **Table 1. Equations in the ordinary differential equation models.** The estimated parameters  
 859 are the 18 parameters of  $k_2, k_3, k_4, k_5, k_6, k_7, k_8, k_{10}, K_2, K_4, K_6, K_8, K_{11}, V, a, b, c,$  and  $d$ .  
 860 Simulations started from the models with initial concentrations of  
 861  $GIP(0), GLP1(0), G(0), I(0), CP,$  and  $X(0)$ . Using the variables, and assuming  
 862  $Duod_G, Ra_{GutG}, GIP, GLP1, G, I, X,$  and  $CP$  are at steady state before ingestion, other initial  
 863 conditions and parameters,  $Ingest_G(0), Ra_{GutG}(0), k_9, k_{11}, k_{12}, k_{13}, GIP_B,$  and  $GLP1_B,$  were  
 864 determined by estimated parameters and initial values (Equations 23–30).

| Equation                                                                           | Definition                                                                                                                        |
|------------------------------------------------------------------------------------|-----------------------------------------------------------------------------------------------------------------------------------|
| $\frac{dIntest_G}{dt} = v_1 - v_6, \#(\text{Equation Error! Bookm})$               | Change in glucose amount in the intestine $Intest_G$ [g] over time                                                                |
| $\frac{dGIP}{dt} = v_2 + v_3, \#(\text{Equation Error! Bookm})$                    | Change in GIP concentration $GIP$ [pM] over time                                                                                  |
| $\frac{dGLP1}{dt} = v_4 + v_5, \#(\text{Equation Error! Bookm})$                   | Change in GLP-1 concentration $GLP1$ [pM] concentration over time                                                                 |
| $\frac{dRa_{GutG}}{dt} = v_6 - v_7, \#(\text{Equation Error! Bookm})$              | Change in the rate of appearance of ingested glucose in the blood $Ra_{GutG}$ [g/min]                                             |
| $\frac{dG}{dt} = \frac{v_7}{V} + v_8 - v_9, \#(\text{Equation Error! Bookm})$      | Change in blood glucose concentration $G$ [mg/dL]; constant $V$ converts ingested glucose amount into blood glucose concentration |
| $\frac{dI}{dt} = v_{10} - v_{11}, \#(\text{Equation Error! Bookm})$                | Change in blood insulin concentration $I$ [pM]                                                                                    |
| $\frac{dCP}{dt} = v_{10} - v_{12}, \#(\text{Equation Error! Bookm})$               | Change in C-peptide concentration $CP$ [pM]                                                                                       |
| $\frac{dX}{dt} = \frac{v_{11}}{k_{11}} - v_{13}, \#(\text{Equation Error! Bookm})$ | Change in insulin concentration acting at target                                                                                  |

|                                                                                                         |                                                                                                                            |
|---------------------------------------------------------------------------------------------------------|----------------------------------------------------------------------------------------------------------------------------|
|                                                                                                         | organs to regulate glucose concentration in the blood $X$ [dimensionless]                                                  |
| $v_1 = \text{Glucose}$ , # (Equation Error! Bookma                                                      | Influx of ingested glucose into the intestine                                                                              |
| $v_2 = \frac{k_2 \text{Intest}_G}{K_2 + \text{Intest}_G}$ , # (Equation Error! Bookr                    | Ingested glucose-dependent secretion of GIP by the intestine                                                               |
| $v_3 = k_3 (\text{GIP}_B - \text{GIP})$ , # (Equation Error! Bo                                         | Absorption of GIP by the intestine and entry into the blood                                                                |
| $v_4 = \frac{k_4 \text{Intest}_G}{K_4 + \text{Intest}_G}$ , # (Equation Error! Bookr                    | Ingested glucose-dependent secretion of GLP-1 by the intestine                                                             |
| $v_5 = k_5 (\text{GLP1}_B - \text{GLP1})$ , # (Equation Error! Bo                                       | Absorption of GLP-1 by the intestine and entry into the blood                                                              |
| $v_6 = \frac{k_6 \text{Intest}_G}{K_6 + \text{Intest}_G}$ , # (Equation Error! Bookr                    | Absorption of ingested glucose from intestine into rate of appearance for continuous ingestion                             |
| $v_7 = k_7 \text{Ra}_{\text{GutG}}$ , # (Equation Error! Bookma                                         | Absorption of ingested glucose from rate of appearance into blood for bolus                                                |
| $v_8 = \frac{k_8}{K_8 + X}$ , # (Equation Error! Bookma                                                 | Flow of glucose produced by the liver into the blood                                                                       |
| $v_9 = k_9 G X$ , # (Equation Error! Bookmar                                                            | Glucose uptake from the blood into the periphery                                                                           |
| $v_{10} = k_{10}(G + a \text{GIP} + b G \text{GIP} + c \text{GLP1})$<br>(Equation Error! Bookmark not d | Insulin secretion; $a$ , independent action of GIP; $b$ , cooperative action of GIP with glucose; $c$ , independent action |

|                                                                   |                                                         |
|-------------------------------------------------------------------|---------------------------------------------------------|
|                                                                   | of GLP-1; $d$ , cooperative action of GLP-1 and glucose |
| $v_{11} = \frac{k_{11} I}{K_{11} + I}$ , #(Equation Error! Bookma | Flow of insulin into target organs                      |
| $v_{12} = k_{12} CP$ , #(Equation Error! Bookma                   | Inactivation of C-peptide                               |
| $v_{13} = k_{13} X$ , #(Equation Error! Bookmar                   | Binding of insulin to target cells                      |

865

866 **Table 2. Properties of the models.** The ODE model has 16 parameters. The roles of the  
 867 incretins in each subject's best fitting full model are shown, along with the predicted peak of  
 868 blood glucose concentrations achieved with the minimization. The values of the parameters of  
 869 the coarse-grained models that produced the peak value of blood glucose level for each subject  
 870 are indicated.

|            | ODE model                                                                                                                                           | Course-grained minimization pattern                                                                                                 |
|------------|-----------------------------------------------------------------------------------------------------------------------------------------------------|-------------------------------------------------------------------------------------------------------------------------------------|
| Subject #1 | Cooperative effect of GIP with glucose<br><br>Minimization pattern: peak value of blood glucose level = 173.95 mg/dL                                | $u_0 = 17$ [g]<br>$u_{60} = 24$ [g]<br>$t_s = 30$ [min]<br>$\Delta t = 0$ [min]<br>Peak value of blood glucose level = 174.07 mg/dL |
| Subject #2 | Independent effect of GIP<br>Cooperative effect of GLP-1 with glucose<br><br>Minimization pattern: peak value of blood glucose level = 112.36 mg/dL | $u_0 = 7$ [g]<br>$u_{60} = 34$ [g]<br>$t_s = 20$ [min]<br>$\Delta t = 20$ [min]<br>Peak value of blood glucose level = 112.43 mg/dL |
| Subject #3 | Cooperative effect of GIP with glucose<br><br>Minimization pattern: peak value of blood glucose level = 125.14 mg/dL                                | $u_0 = 6$ [g]<br>$u_{60} = 31$ [g]<br>$t_s = 20$ [min]<br>$\Delta t = 30$ [min]<br>Peak value of blood glucose level = 125.75 mg/dL |

871



# Figure 1

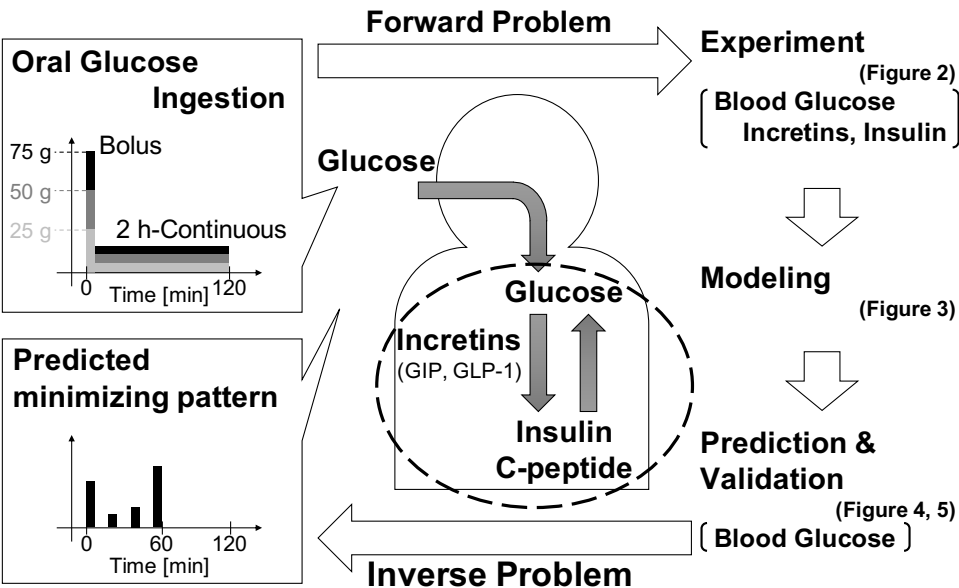

# Figure 2

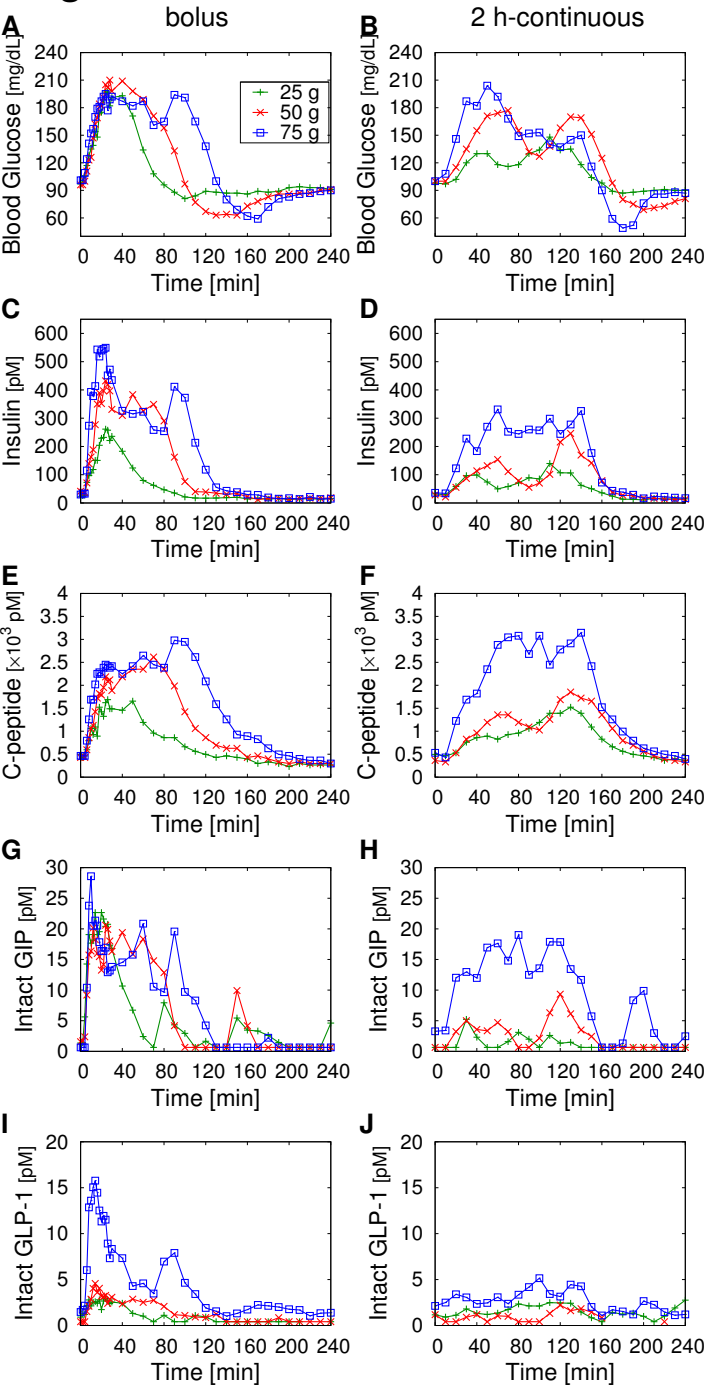

**Figure 3**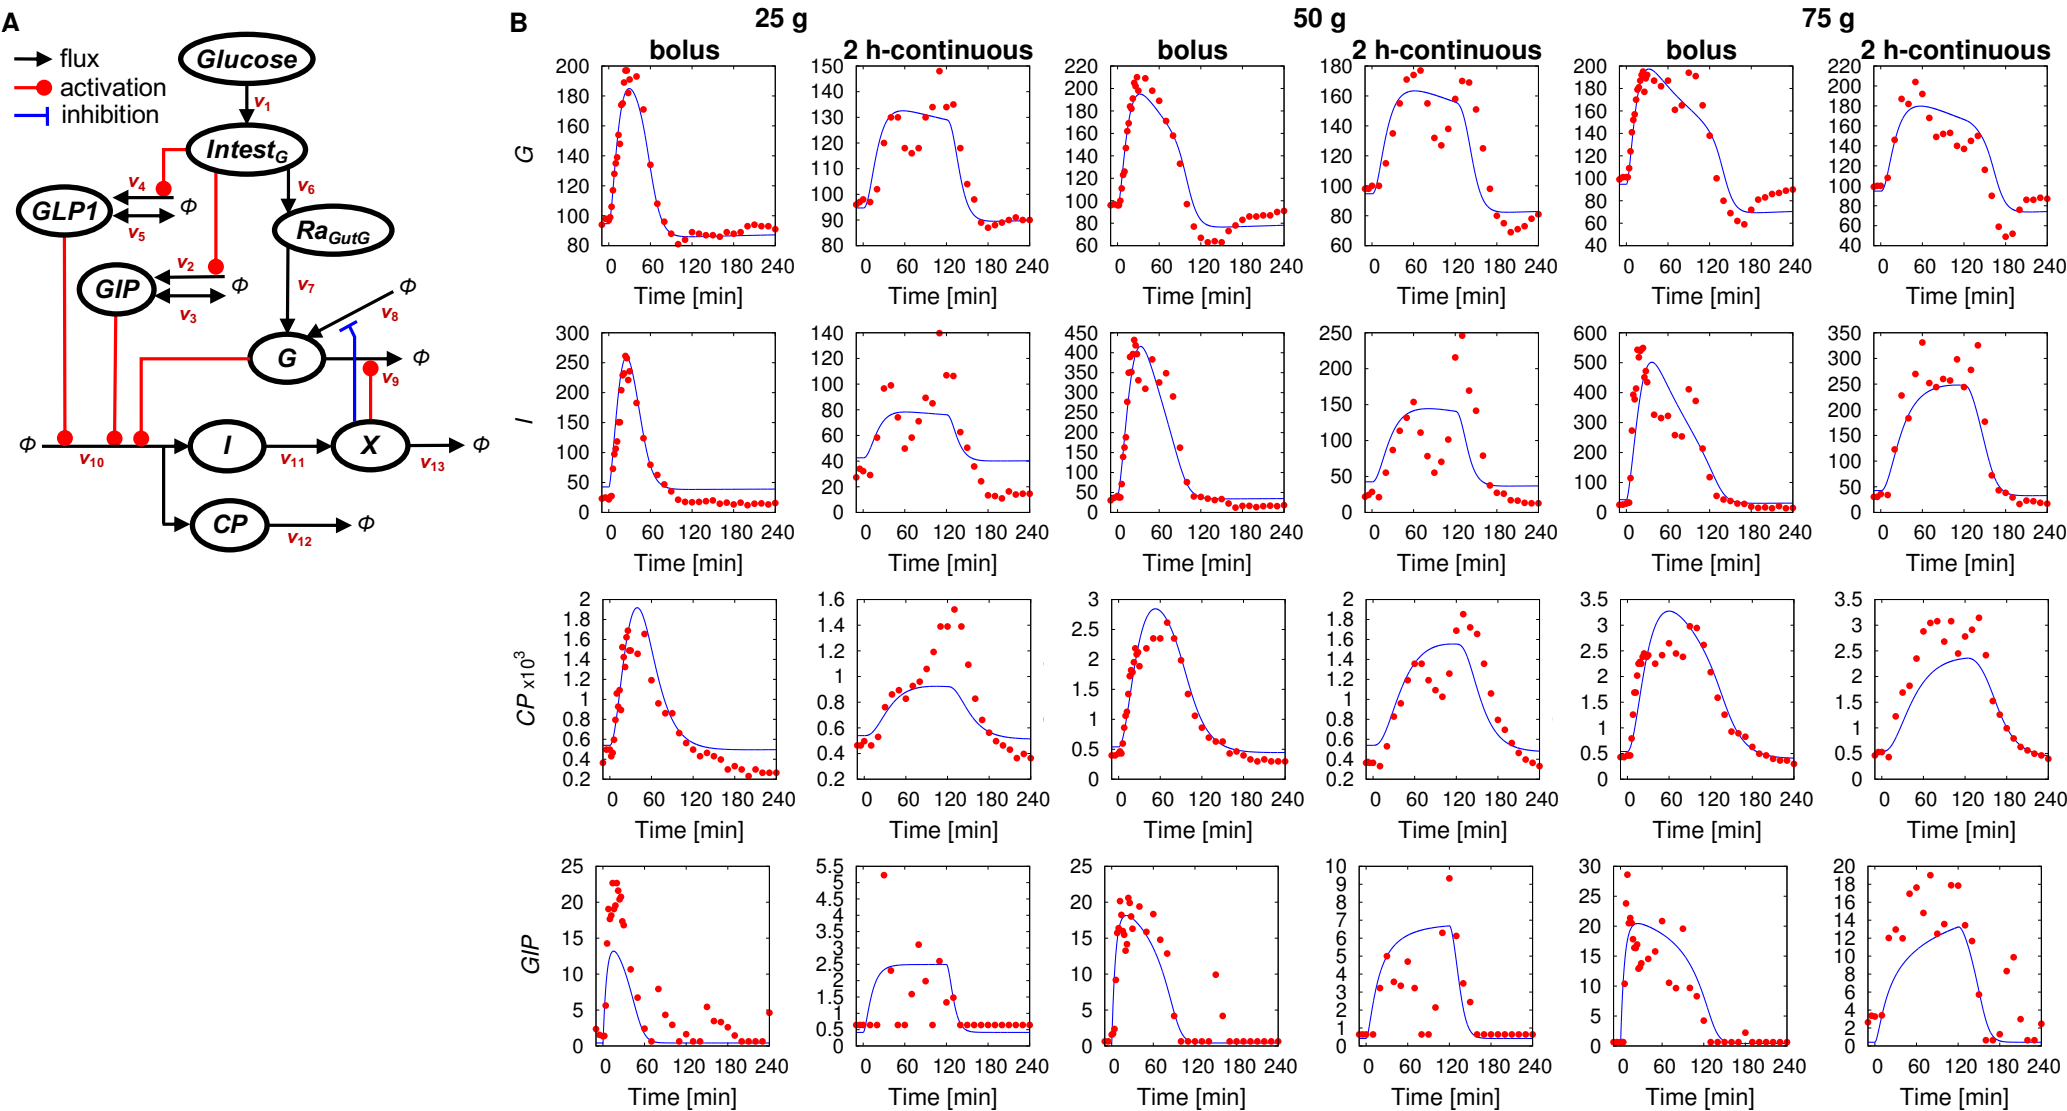

**Figure 4**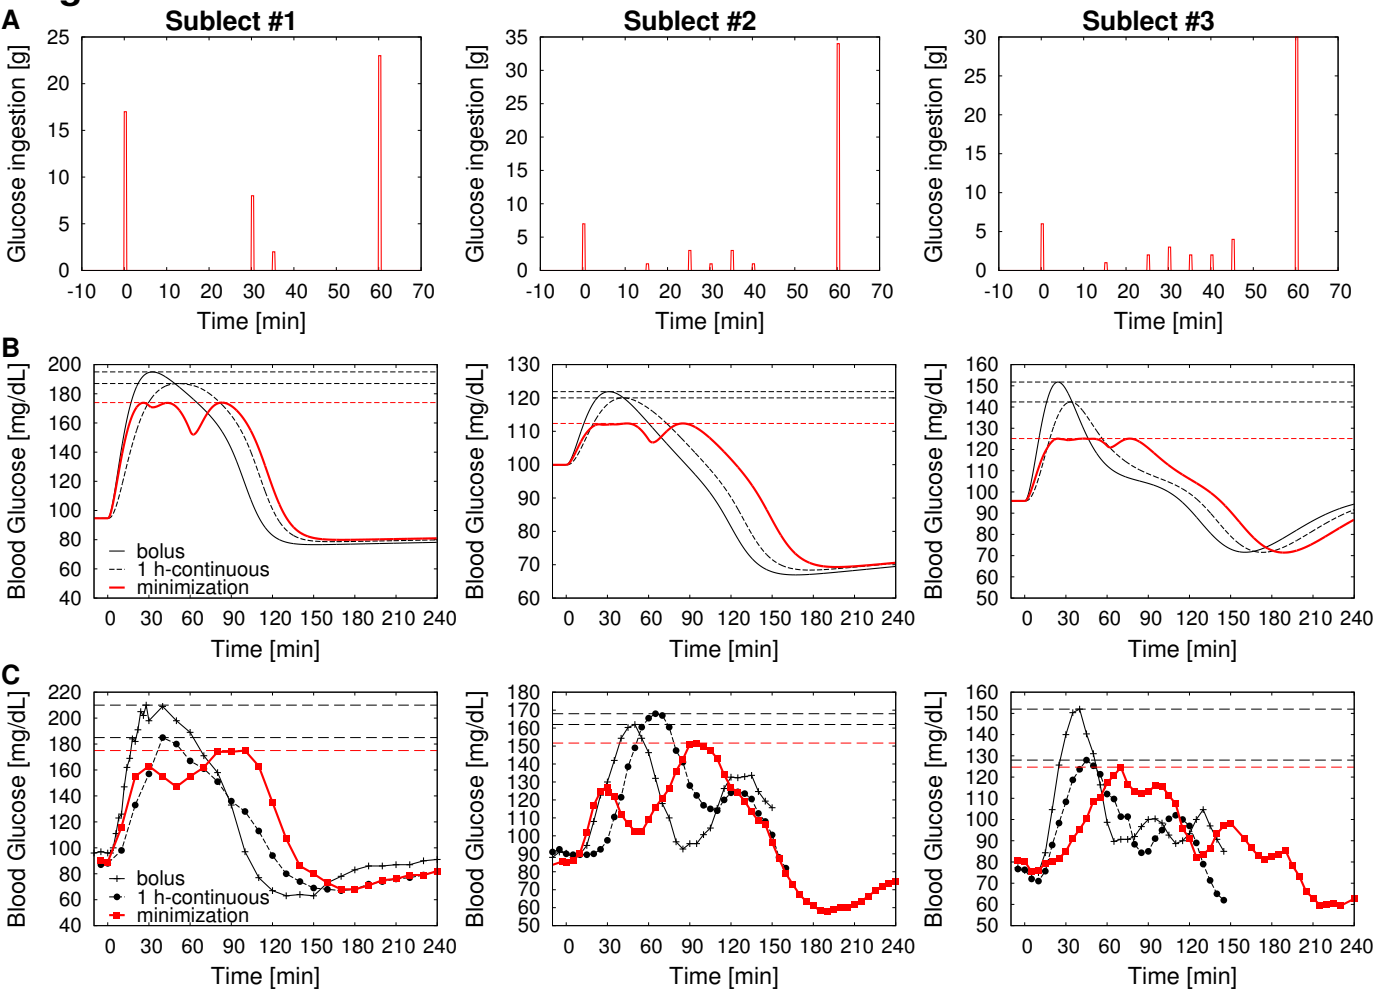

**Figure 5**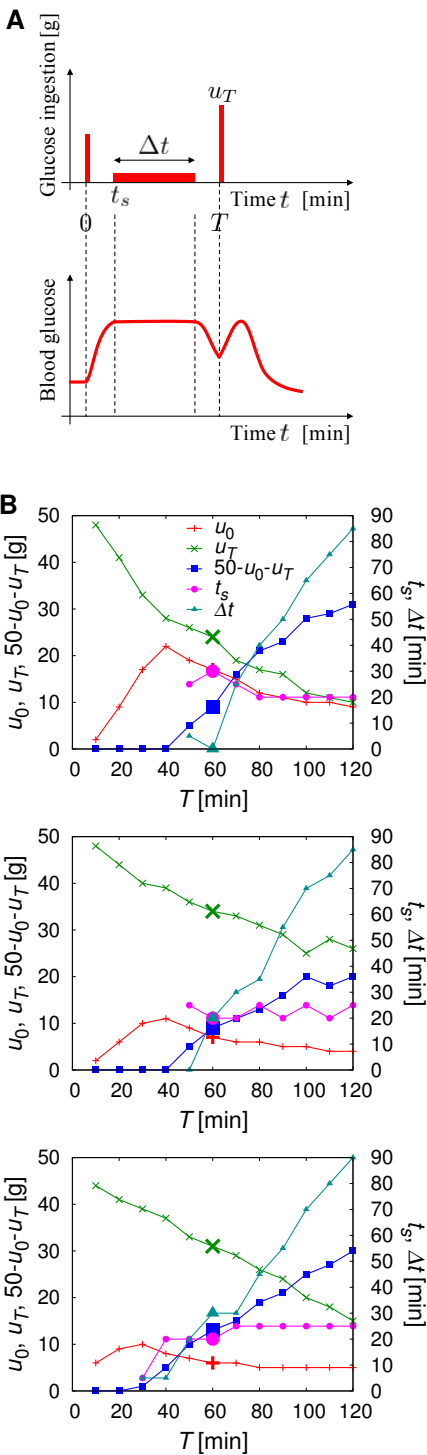

Source: https://www.biorxiv.org/content/10.1101/352955v1.full.pdf
